# Supplementary material for: Optimization of LC-MS2 Data Acquisition Parameters for Molecular Networking Applied to Marine Natural Products
Source: MDPI journal article supplement (doi:10.3390/metabo12030245), 2022-03-14
Supplement: s1 [file s1]

# Optimization of LC-MS<sup>2</sup> Data Acquisition Parameters for Molecular Networking applied to Marine Natural Products

Sam Afoullouss<sup>1,2</sup>, Agata Balsam<sup>1</sup>, A. Louise Allcock<sup>2</sup> and Olivier P. Thomas<sup>1\*</sup>

<sup>1</sup> School of Biological and Chemical Sciences and Ryan Institute, National University of Ireland Galway (NUI Galway), University Road, H91TK33 Galway, Ireland; s.afoullouss1@nuigalway.ie (SA); A.Balsam1@nuigalway.ie (AB); olivier.thomas@nuigalway.ie (O.T)

<sup>2</sup> School of Natural Sciences and Ryan Institute, National University of Ireland Galway (NUI Galway), University Road, H91TK33 Galway, Ireland; louise.allcock@nuigalway.ie (ALA)

\* Correspondence: Olivier.thomas@nuigalway.ie

|                                                                                                                                                                                                                                                                                                                                                                |    |
|----------------------------------------------------------------------------------------------------------------------------------------------------------------------------------------------------------------------------------------------------------------------------------------------------------------------------------------------------------------|----|
| Figure S1: UPLC-ESI-MS <sup>2</sup> profiles of <i>Ascidia virginea</i> run on a C <sub>18</sub> column.....                                                                                                                                                                                                                                                   | 5  |
| Figure S2: LC-MS <sup>2</sup> profiles of <i>Parazoanthus axinellae</i> run on a C <sub>18</sub> column.....                                                                                                                                                                                                                                                   | 5  |
| Figure S3: LC-MS <sup>2</sup> profiles of <i>Halidrys siliquosa</i> run on a C <sub>18</sub> column. ....                                                                                                                                                                                                                                                      | 5  |
| Table S1: Table showing the LC-MS <sup>2</sup> parameters (factors) chosen for molecular networking optimization and the levels used for each factor. The order of experiments (right) shows the levels for each factor per run, with + representing the higher level, - representing the lower level and 0 representing the midpoint. ....                    | 6  |
| Table S2: Responses of molecular networks for 34 experimental conditions on Classical Molecular Networking workflow on sample <i>Ascidia virginea</i> . ....                                                                                                                                                                                                   | 7  |
| Table S3: Responses of molecular networks for 34 experimental conditions on Classical Molecular Networking workflow on sample <i>Parazoanthus axinellae</i> . ....                                                                                                                                                                                             | 8  |
| Table S4: Responses of molecular networks for 34 experimental conditions on Classical Molecular Networking workflow on sample <i>Halidrys siliquosa</i> . ....                                                                                                                                                                                                 | 9  |
| Table S5: Responses of molecular networks for 34 experimental conditions on Feature-Based Molecular Networking workflow on sample <i>Ascidia virginea</i> ....                                                                                                                                                                                                 | 10 |
| Table S6: Responses of molecular networks for 34 experimental conditions on Feature-Based Molecular Networking workflow on sample <i>Parazoanthus axinellae</i> . ....                                                                                                                                                                                         | 11 |
| Table S7: Responses of molecular networks for 34 experimental conditions on Feature-Based Molecular Networking workflow on sample <i>Halidrys siliquosa</i> . ....                                                                                                                                                                                             | 12 |
| Table S8: R <sup>2</sup> , R <sup>2</sup> (predicted), R <sup>2</sup> (adjusted), PRESS, S and P statistical values of response models for three samples and two workflows. Models included in summary analysis are indicated with an asterisk. Models highlighted in red were excluded from final analysis because non-significant (R <sup>2</sup> <20). .... | 13 |
| Figure S4: DoE reports for number of node model in Classical Molecular Networking of <i>Ascidia virginea</i> , normal plot of standardized effects (top left), half normal plot of standardized effects (top right), pareto chart of standardized effects (bottom left), and residual plots (bottom right).....                                                | 14 |
| Figure S5: DoE reports for cluster co-efficient model in Classical Molecular Networking of <i>Ascidia virginea</i> , normal plot of standardized effects (top left), half normal plot of standardized effects (top right), pareto chart of standardized effects (bottom left), and residual plots (bottom right).....                                          | 15 |
| Figure S6: DoE reports for average number of neighbours model in Classical Molecular Networking of <i>Ascidia virginea</i> , normal plot of standardized effects (top left), half normal plot of standardized effects (top right), pareto chart of standardized effects (bottom left), and residual plots (bottom right).....                                  | 16 |
| Figure S7: DoE reports for number of self-loop nodes model in Classical Molecular Networking of <i>Ascidia virginea</i> , normal plot of standardized effects (top left), half normal plot of standardized effects (top right), pareto chart of standardized effects (bottom left), and residual plots (bottom right).....                                     | 17 |

|                                                                                                                                                                                                                                                                                                                                           |    |
|-------------------------------------------------------------------------------------------------------------------------------------------------------------------------------------------------------------------------------------------------------------------------------------------------------------------------------------------|----|
| Figure S8: DoE reports for number of edges model in Classical Molecular Networking of <i>Ascidia virginea</i> , normal plot of standardized effects (top left), half normal plot of standardized effects (top right), pareto chart of standardized effects (bottom left), and residual plots (bottom right).....                          | 18 |
| Figure S9: DoE reports for average cosine score model in Classical Molecular Networking of <i>Ascidia virginea</i> , normal plot of standardized effects (top left), half normal plot of standardized effects (top right), pareto chart of standardized effects (bottom left), and residual plots (bottom right).....                     | 19 |
| Figure S10: DoE reports for number of nodes model in Classical Molecular Networking of <i>Parazoanthus axinellae</i> , normal plot of standardized effects (top left), half normal plot of standardized effects (top right), pareto chart of standardized effects (bottom left), and residual plots (bottom right).....                   | 20 |
| Figure S11: DoE reports for cluster co-efficient model in Classical Molecular Networking of <i>Parazoanthus axinellae</i> , normal plot of standardized effects (top left), half normal plot of standardized effects (top right), pareto chart of standardized effects (bottom left), and residual plots (bottom right).<br>.....         | 21 |
| Figure S12: DoE reports for average number of neighbours model in Classical Molecular Networking of <i>Parazoanthus axinellae</i> , normal plot of standardized effects (top left), half normal plot of standardized effects (top right), pareto chart of standardized effects (bottom left), and residual plots (bottom right).<br>..... | 22 |
| Figure S13: DoE reports for number of self-loop nodes model in Classical Molecular Networking of <i>Parazoanthus axinellae</i> , normal plot of standardized effects (top left), half normal plot of standardized effects (top right), pareto chart of standardized effects (bottom left), and residual plots (bottom right).<br>.....    | 23 |
| Figure S14: DoE reports for number of edges model in Classical Molecular Networking of <i>Parazoanthus axinellae</i> , normal plot of standardized effects (top left), half normal plot of standardized effects (top right), pareto chart of standardized effects (bottom left), and residual plots (bottom right).....                   | 24 |
| Figure S15: DoE reports for average cosine score model in Classical Molecular Networking of <i>Parazoanthus axinellae</i> , normal plot of standardized effects (top left), half normal plot of standardized effects (top right), pareto chart of standardized effects (bottom left), and residual plots (bottom right).<br>.....         | 25 |
| Figure S16: DoE reports for number of nodes model in Classical Molecular Networking of <i>Halidrys siliquosa</i> , normal plot of standardized effects (top left), half normal plot of standardized effects (top right), pareto chart of standardized effects (bottom left), and residual plots (bottom right).....                       | 26 |
| Figure S17: DoE reports for cluster co-efficient model in Classical Molecular Networking of <i>Halidrys siliquosa</i> , normal plot of standardized effects (top left), half normal plot of standardized effects (top right), pareto chart of standardized effects (bottom left), and residual plots (bottom right).....                  | 27 |
| Figure S18: DoE reports for average number of neighbours model in Classical Molecular Networking of <i>Halidrys siliquosa</i> , normal plot of standardized effects (top left), half normal plot of standardized effects (top right), pareto chart of standardized effects (bottom left), and residual plots (bottom right).<br>.....     | 28 |
| Figure S19: DoE reports for number of self-loop nodes model in Classical Molecular Networking of <i>Halidrys siliquosa</i> , normal plot of standardized effects (top left), half normal plot of standardized effects (top right), pareto chart of standardized effects (bottom left), and residual plots (bottom right).<br>.....        | 29 |
| Figure S20: DoE reports for number of nodes model in Classical Molecular Networking of <i>Halidrys siliquosa</i> , normal plot of standardized effects (top left), half normal plot of standardized effects (top right), pareto chart of standardized effects (bottom left), and residual plots (bottom right).....                       | 30 |
| Figure S21: DoE reports for average cosine model in Classical Molecular Networking of <i>Halidrys siliquosa</i> , normal plot of standardized effects (top left), half normal plot of standardized effects (top right), pareto chart of standardized effects (bottom left), and residual plots (bottom right).....                        | 31 |
| Figure S22: DoE reports for number of node model in Feature-Based Molecular Networking of <i>Ascidia virginea</i> , normal plot of standardized effects (top left), half normal plot of standardized effects (top right), pareto chart of standardized effects (bottom left), and residual plots (bottom right).....                      | 32 |

|                                                                                                                                                                                                                                                                                                                                            |    |
|--------------------------------------------------------------------------------------------------------------------------------------------------------------------------------------------------------------------------------------------------------------------------------------------------------------------------------------------|----|
| Figure S23: DoE reports for cluster co-efficient model in Feature-Based Molecular Networking of <i>Ascidia virginea</i> , normal plot of standardized effects (top left), half normal plot of standardized effects (top right), pareto chart of standardized effects (bottom left), and residual plots (bottom right). .....               | 33 |
| Figure S24: DoE reports for average number of neighbours model in Feature-Based Molecular Networking of <i>Ascidia virginea</i> , normal plot of standardized effects (top left), half normal plot of standardized effects (top right), pareto chart of standardized effects (bottom left), and residual plots (bottom right). .....       | 34 |
| Figure S25: DoE reports for number of self-loop nodes model in Feature-Based Molecular Networking of <i>Ascidia virginea</i> , normal plot of standardized effects (top left), half normal plot of standardized effects (top right), pareto chart of standardized effects (bottom left), and residual plots (bottom right). .....          | 35 |
| Figure S26: DoE reports for number of edges model in Feature-Based Molecular Networking of <i>Ascidia virginea</i> , normal plot of standardized effects (top left), half normal plot of standardized effects (top right), pareto chart of standardized effects (bottom left), and residual plots (bottom right). .....                    | 36 |
| Figure S27: DoE reports for average cosine score model in Feature-Based Molecular Networking of <i>Ascidia virginea</i> normal plot of standardized effects (top left), half normal plot of standardized effects (top right), pareto chart of standardized effects (bottom left), and residual plots (bottom right). .....                 | 37 |
| Figure S28: DoE reports for number of node model in Feature-Based Molecular Networking of <i>Parazoanthus axinellae</i> , normal plot of standardized effects (top left), half normal plot of standardized effects (top right), pareto chart of standardized effects (bottom left), and residual plots (bottom right). .....               | 38 |
| Figure S29: DoE reports for cluster co-efficient model in Feature-Based Molecular Networking of <i>Parazoanthus axinellae</i> , normal plot of standardized effects (top left), half normal plot of standardized effects (top right), pareto chart of standardized effects (bottom left), and residual plots (bottom right). .....         | 39 |
| Figure S30: DoE reports for average number of neighbours model in Feature-Based Molecular Networking of <i>Parazoanthus axinellae</i> , normal plot of standardized effects (top left), half normal plot of standardized effects (top right), pareto chart of standardized effects (bottom left), and residual plots (bottom right). ..... | 40 |
| Figure S31: DoE reports for number of self-loop nodes model in Feature-Based Molecular Networking of <i>Parazoanthus axinellae</i> , normal plot of standardized effects (top left), half normal plot of standardized effects (top right), pareto chart of standardized effects (bottom left), and residual plots (bottom right). .....    | 41 |
| Figure S32: DoE reports for number of edges model in Feature-Based Molecular Networking of <i>Parazoanthus axinellae</i> , normal plot of standardized effects (top left), half normal plot of standardized effects (top right), pareto chart of standardized effects (bottom left), and residual plots (bottom right). .....              | 42 |
| Figure S33: DoE reports for average cosine score model in Feature-Based Molecular Networking of <i>Parazoanthus axinellae</i> , normal plot of standardized effects (top left), half normal plot of standardized effects (top right), pareto chart of standardized effects (bottom left), and residual plots (bottom right). .....         | 43 |
| Figure S34: DoE reports for number of nodes model in Feature-Based Molecular Networking of <i>Halidrys siliquosa</i> , normal plot of standardized effects (top left), half normal plot of standardized effects (top right), pareto chart of standardized effects (bottom left), and residual plots (bottom right). .....                  | 44 |
| Figure S35: DoE reports for cluster co-efficient model in Feature-Based Molecular Networking of <i>Halidrys siliquosa</i> , normal plot of standardized effects (top left), half normal plot of standardized effects (top right), pareto chart of standardized effects (bottom left), and residual plots (bottom right). .....             | 45 |
| Figure S36: : DoE reports for cluster co-efficient model in Feature-Based Molecular Networking of <i>Halidrys siliquosa</i> , normal plot of standardized effects (top left), half normal plot of standardized effects (top right), pareto chart of standardized effects (bottom left), and residual plots (bottom right). .....           | 46 |
| Figure S37: DoE reports for number of self-loop nodes model in Feature-Based Molecular Networking of <i>Halidrys siliquosa</i> , normal plot of standardized effects (top left), half normal plot of standardized                                                                                                                          |    |

|                                                                                                                                                                                                                                                                                                                                         |    |
|-----------------------------------------------------------------------------------------------------------------------------------------------------------------------------------------------------------------------------------------------------------------------------------------------------------------------------------------|----|
| effects (top right), pareto chart of standardized effects (bottom left), and residual plots (bottom right).<br>.....                                                                                                                                                                                                                    | 47 |
| Figure S38: DoE reports for number of edges model in Feature-Based Molecular Networking of <i>Halidrys<br/>siliquosa</i> , normal plot of standardized effects (top left), half normal plot of standardized effects (top<br>right), pareto chart of standardized effects (bottom left), and residual plots (bottom right).<br>.....     | 48 |
| Figure S39: DoE reports for average cosine score model in Feature-Based Molecular Networking of<br><i>Halidrys siliquosa</i> , normal plot of standardized effects (top left), half normal plot of standardized effects<br>(top right), pareto chart of standardized effects (bottom left), and residual plots (bottom right).<br>..... | 49 |

## LC-MS profiles

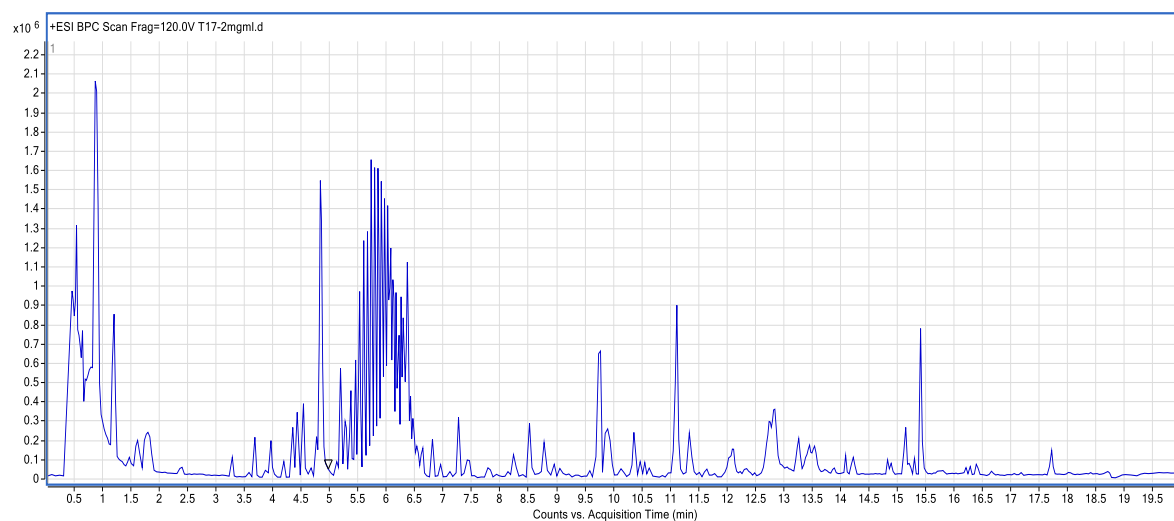Figure S1: UPLC-ESI-MS<sup>2</sup> profiles of *Ascidia virginea* run on a C<sub>18</sub> column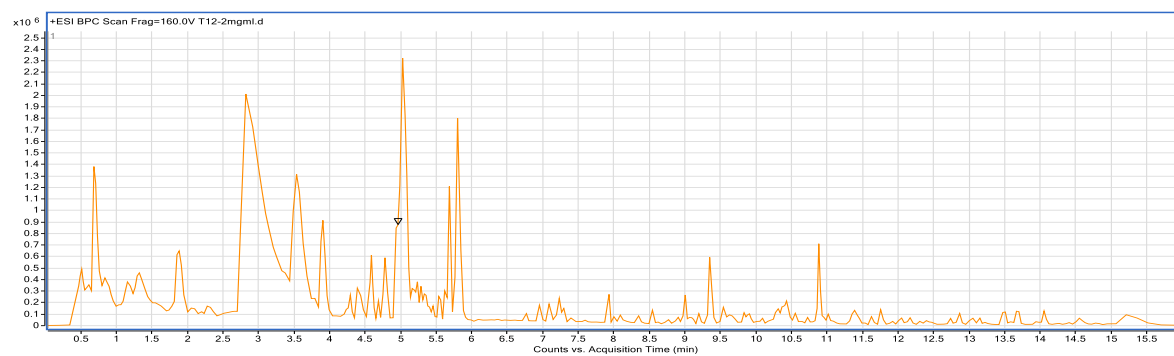Figure S2: LC-MS<sup>2</sup> profiles of *Parazoanthus axinellae* run on a C<sub>18</sub> column.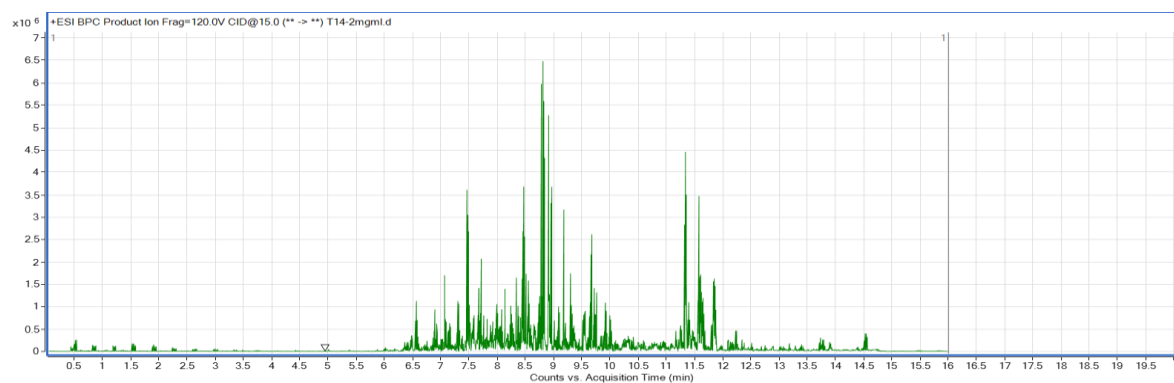Figure S3: LC-MS<sup>2</sup> profiles of *Halidrys siliquosa* run on a C<sub>18</sub> column.

## Design of Experiment (DOE)

| Factor |                     | Low Level (-) | Centre Point (0) | High Level (+) | DOE |   |   |   |   |   |   |   |   |   |   |   |
|--------|---------------------|---------------|------------------|----------------|-----|---|---|---|---|---|---|---|---|---|---|---|
| A      | Concentration       | 0.1 mg/mL     | 1 mg/ mL         | 2.0mg/mL       | Run | A | B | C | D | E | F | G | H | J | K | L |
|        |                     |               |                  |                | 1   | - | - | + | + | + | + | - | + | - | - | - |
|        |                     |               |                  |                | 2   | - | + | + | + | + | - | + | + | - | - | + |
|        |                     |               |                  |                | 3   | - | + | - | - | - | + | + | - | - | - | + |
| B      | LC duration         | 10 min        | 12 min           | 14 min         | 4   | + | - | + | + | + | - | - | + | + | + | - |
|        |                     |               |                  |                | 5   | - | + | - | + | - | + | - | + | + | + | + |
|        |                     |               |                  |                | 6   | + | + | - | - | - | - | + | - | + | + | + |
| C      | Collision Energy    | 15 eV         | 30 eV            | 50 eV          | 7   | + | - | - | - | - | + | - | - | + | + | - |
|        |                     |               |                  |                | 8   | - | - | + | - | - | + | + | + | + | - | - |
|        |                     |               |                  |                | 9   | + | - | + | + | - | - | - | - | + | - | + |
| D      | Precursor Per Cycle | 3             | 5                | 7              | 10  | - | - | - | + | + | - | + | - | + | - | - |
|        |                     |               |                  |                | 11  | - | + | + | + | - | - | + | - | - | + | - |
|        |                     |               |                  |                | 12  | + | - | - | + | + | + | + | - | - | + | - |
| E      | Gas Temp.           | 250°C         | 300°C            | 350°C          | 13  | - | - | - | - | - | - | - | - | - | - | - |
|        |                     |               |                  |                | 14  | + | - | - | - | + | + | - | + | + | - | + |
|        |                     |               |                  |                | 15  | + | - | - | + | - | + | + | + | - | - | + |
| F      | Nebuliser Pressure  | 25 PSI        | 30 PSI           | 35 PSI         | 16  | + | - | + | - | + | - | + | - | - | - | + |
|        |                     |               |                  |                | 17  | + | + | + | + | - | + | + | - | + | - | - |
|        |                     |               |                  |                | 18  | + | + | - | + | + | - | - | - | - | + | + |
|        |                     |               |                  |                | 19  | + | - | + | - | - | + | + | + | - | + | - |
| G      | Sheath Gas Temp.    | 275°C         | 310°C            | 350°C          | 20  | 0 | 0 | 0 | 0 | 0 | 0 | 0 | 0 | 0 | 0 | 0 |
|        |                     |               |                  |                | 21  | + | + | - | + | - | - | - | + | - | - | - |
| H      | Capillary Voltage   | 300 V         | 1750 V           | 3500 V         | 22  | - | + | - | - | + | + | + | + | - | + | - |
|        |                     |               |                  |                | 23  | - | + | - | + | + | + | - | - | + | - | + |
|        |                     |               |                  |                | 24  | 0 | 0 | 0 | 0 | 0 | 0 | 0 | 0 | 0 | 0 | 0 |
| J      | Nozzle Voltage      | 500 V         | 750 V            | 1000 V         | 25  | + | + | + | - | - | + | - | + | - | + | + |
|        |                     |               |                  |                | 26  | - | - | + | - | + | + | + | - | + | + | + |
|        |                     |               |                  |                | 27  | - | - | + | + | - | + | - | - | - | + | + |
|        |                     |               |                  |                | 28  | - | - | - | - | + | - | - | + | - | + | + |
| K      | Fragmentor Voltage  | 120 V         | 140 V            | 160 V          | 29  | + | + | + | + | + | + | + | + | + | + | + |
|        |                     |               |                  |                | 30  | - | + | + | - | + | - | - | - | + | + | - |
|        |                     |               |                  |                | 31  | + | + | - | - | + | - | + | + | + | - | - |
| L      | Skimmer Voltage     | 30 V          | 55 V             | 80 V           | 32  | + | + | + | - | + | + | - | - | - | - | - |
|        |                     |               |                  |                | 33  | - | + | + | - | - | - | - | + | + | - | + |
|        |                     |               |                  |                | 34  | - | - | - | + | - | - | + | + | + | + | + |

Table S1: Table showing the LC-MS<sup>2</sup> parameters (factors) chosen for molecular networking optimization and the levels used for each factor. The order of experiments (right) shows the levels for each factor per run, with + representing the higher level, - representing the lower level and 0 representing the midpoint.

## Network statistics (Cytoscape)

| Run | # Nodes | Cluster co-efficient | Average # neighbours | # self-loop nodes | #Edges | Average Cosine score |
|-----|---------|----------------------|----------------------|-------------------|--------|----------------------|
| T1  | 131     | 0.182                | 2.458                | 64                | 225    | 0.8828               |
| T2  | 181     | 0.215                | 1.945                | 93                | 269    | 0.9136               |
| T3  | 155     | 0.163                | 2.155                | 73                | 240    | 0.8999               |
| T4  | 263     | 0.224                | 2.167                | 138               | 423    | 0.90897              |
| T5  | 151     | 0.204                | 1.96                 | 66                | 214    | 0.8963               |
| T6  | 274     | 0.221                | 2.438                | 139               | 473    | 0.8736               |
| T7  | 222     | 0.249                | 2.324                | 111               | 369    | 0.8717               |
| T8  | 141     | 0.217                | 2.312                | 70                | 233    | 0.9072               |
| T9  | 282     | 0.17                 | 2.113                | 142               | 440    | 0.9011               |
| T10 | 147     | 0.193                | 2.054                | 61                | 212    | 0.9023               |
| T11 | 173     | 0.186                | 1.919                | 99                | 265    | 0.9342               |
| T12 | 268     | 0.256                | 2.276                | 141               | 446    | 0.8721               |
| T13 | 122     | 0.154                | 2.049                | 60                | 185    | 0.9075               |
| T14 | 236     | 0.233                | 2.602                | 108               | 415    | 0.8619               |
| T15 | 275     | 0.21                 | 2.073                | 134               | 419    | 0.8739               |
| T16 | 270     | 0.181                | 2.111                | 146               | 431    | 0.9241               |
| T17 | 330     | 0.167                | 2.139                | 184               | 537    | 0.91599              |
| T18 | 311     | 0.209                | 2.238                | 146               | 494    | 0.863                |
| T19 | 221     | 0.207                | 2.335                | 113               | 371    | 0.9304               |
| T20 | 289     | 0.2                  | 2.048                | 131               | 427    | 0.9079               |
| T21 | 238     | 0.201                | 2                    | 128               | 366    | 0.8746               |
| T22 | 135     | 0.223                | 2.222                | 65                | 215    | 0.9114               |
| T23 | 148     | 0.15                 | 1.865                | 79                | 217    | 0.9099               |
| T24 | 295     | 0.274                | 2.285                | 137               | 474    | 0.8995               |
| T25 | 303     | 0.267                | 2.224                | 137               | 454    | 0.908                |
| T26 | 138     | 0.271                | 2.522                | 68                | 242    | 0.9098               |
| T27 | 148     | 0.175                | 2.108                | 77                | 233    | 0.8996               |
| T28 | 128     | 0.144                | 1.7344               | 67                | 178    | 0.9063               |
| T29 | 363     | 0.161                | 1.906                | 198               | 544    | 0.9233               |
| T30 | 152     | 0.239                | 2.434                | 67                | 252    | 0.8968               |
| T31 | 271     | 0.226                | 2.458                | 120               | 453    | 0.8645               |
| T32 | 261     | 0.225                | 2.521                | 118               | 447    | 0.9007               |
| T33 | 153     | 0.265                | 2.627                | 68                | 269    | 0.8879               |
| T34 | 158     | 0.184                | 1.975                | 78                | 234    | 0.9034               |

Table S2: Responses of molecular networks for 34 experimental conditions on Classical Molecular Networking workflow on sample *Ascidia virginea*.

| Run | # Nodes | Cluster co-efficient | Average # neighbours | # self-loop nodes | #Edges | Average Cosine score |
|-----|---------|----------------------|----------------------|-------------------|--------|----------------------|
| T1  | 116     | 0.083                | 1.138                | 77                | 143    | 0.941                |
| T2  | 134     | 0.148                | 1.343                | 87                | 177    | 0.947                |
| T3  | 150     | 0.188                | 2.12                 | 87                | 146    | 0.924                |
| T4  | 211     | 0.207                | 1.583                | 118               | 285    | 0.906                |
| T5  | 114     | 0.198                | 2.702                | 56                | 210    | 0.924                |
| T6  | 278     | 0.257                | 1.763                | 146               | 391    | 0.887                |
| T7  | 233     | 0.189                | 1.511                | 129               | 305    | 0.907                |
| T8  | 137     | 0.134                | 1.08                 | 83                | 157    | 0.921                |
| T9  | 260     | 0.181                | 1.777                | 141               | 372    | 0.898                |
| T10 | 124     | 0.215                | 2.177                | 59                | 194    | 0.91                 |
| T11 | 132     | 0.161                | 1.439                | 84                | 179    | 0.933                |
| T12 | 245     | 0.142                | 1.331                | 132               | 295    | 0.905                |
| T13 | 124     | 0.173                | 2.1777               | 67                | 202    | 0.923                |
| T14 | 245     | 0.134                | 1.518                | 133               | 319    | 0.9                  |
| T15 | 241     | 0.151                | 1.502                | 128               | 309    | 0.909                |
| T16 | 252     | 0.258                | 2.079                | 116               | 378    | 0.891                |
| T17 | 277     | 0.126                | 1.3                  | 170               | 350    | 0.921                |
| T18 | 290     | 0.154                | 1.297                | 161               | 349    | 0.902                |
| T19 | 218     | 0.219                | 1.899                | 103               | 310    | 0.902                |
| T20 | 254     | 0.305                | 2.307                | 108               | 401    | 0.891                |
| T21 | 206     | 0.142                | 1.194                | 125               | 248    | 0.919                |
| T22 | 133     | 0.19                 | 2.165                | 75                | 219    | 0.914                |
| T23 | 147     | 0.175                | 2.054                | 75                | 226    | 0.915                |
| T24 | 243     | 0.215                | 1.877                | 122               | 350    | 0.908                |
| T25 | 283     | 0.198                | 1.972                | 149               | 428    | 0.905                |
| T26 | 126     | 0.253                | 1.825                | 63                | 178    | 0.909                |
| T27 | 97      | 0.155                | 1.278                | 51                | 113    | 0.927                |
| T28 | 126     | 0.185                | 1.667                | 73                | 178    | 0.93                 |
| T29 | 326     | 0.191                | 1.687                | 187               | 462    | 0.907                |
| T30 | 120     | 0.157                | 1.383                | 66                | 149    | 0.909                |
| T31 | 262     | 0.214                | 1.794                | 131               | 366    | 0.886                |
| T32 | 258     | 0.228                | 2.078                | 140               | 408    | 0.899                |
| T33 | 119     | 0.188                | 1.227                | 68                | 141    | 0.914                |
| T34 | 115     | 0.171                | 2.539                | 56                | 202    | 0.919                |

Table S3: Responses of molecular networks for 34 experimental conditions on Classical Molecular Networking workflow on sample *Parazoanthus axinellae*.



| Run | # Nodes | Cluster co-efficient | Average # neighbours | # self-loop nodes | #Edges | Average Cosine score |
|-----|---------|----------------------|----------------------|-------------------|--------|----------------------|
| T1  | 122     | 0.156                | 1.525                | 75                | 168    | 0.924                |
| T2  | 144     | 0.155                | 1.514                | 77                | 186    | 0.937                |
| T3  | 161     | 0.163                | 1.963                | 89                | 247    | 0.921                |
| T4  | 200     | 0.151                | 1.18                 | 112               | 230    | 0.892                |
| T5  | 167     | 0.178                | 2.12                 | 79                | 256    | 0.887                |
| T6  | 215     | 0.134                | 1.274                | 119               | 256    | 0.901                |
| T7  | 155     | 0.092                | 1.019                | 86                | 165    | 0.904                |
| T8  | 113     | 0.111                | 1.628                | 61                | 153    | 0.925                |
| T9  | 203     | 0.121                | 1.113                | 116               | 229    | 0.899                |
| T10 | 144     | 0.24                 | 2.431                | 68                | 243    | 0.902                |
| T11 | 155     | 0.133                | 1.342                | 92                | 196    | 0.945                |
| T12 | 209     | 0.091                | 1.244                | 140               | 270    | 0.922                |
| T13 | 21      | 0.186                | 2.281                | 60                | 198    | 0.896                |
| T14 | 158     | 0.028                | 0.443                | 111               | 146    | 0.953                |
| T15 | 213     | 0.117                | 1.418                | 122               | 273    | 0.901                |
| T16 | 181     | 0.205                | 1.514                | 85                | 222    | 0.878                |
| T17 | 282     | 0.126                | 1.333                | 158               | 346    | 0.901                |
| T18 | 269     | 0.125                | 1.242                | 163               | 330    | 0.91                 |
| T19 | 158     | 0.107                | 0.975                | 99                | 176    | 0.917                |
| T20 | 237     | 0.14                 | 1.207                | 142               | 285    | 0.915                |
| T21 | 245     | 0.149                | 1.567                | 130               | 322    | 0.888                |
| T22 | 152     | 0.153                | 1.934                | 92                | 239    | 0.92                 |
| T23 | 172     | 0.163                | 1.733                | 89                | 238    | 0.909                |
| T24 | 236     | 0.156                | 1.178                | 154               | 293    | 0.923                |
| T25 | 199     | 0.085                | 0.945                | 116               | 210    | 0.907                |
| T26 | 115     | 0.094                | 1.426                | 67                | 149    | 0.93                 |
| T27 | 133     | 0.147                | 1.564                | 80                | 184    | 0.917                |
| T28 | 112     | 0.149                | 1.339                | 62                | 137    | 0.904                |
| T29 | 276     | 0.153                | 1.29                 | 161               | 339    | 0.903                |
| T30 | 114     | 0.098                | 1.14                 | 75                | 140    | 0.934                |
| T31 | 209     | 0.14                 | 1.196                | 137               | 262    | 0.929                |
| T32 | 195     | 0.14                 | 1.221                | 100               | 219    | 0.888                |
| T33 | 102     | 0.147                | 1.373                | 61                | 131    | 0.925                |
| T34 | 156     | 0.181                | 2.192                | 83                | 254    | 0.905                |

Table S4: Responses of molecular networks for 34 experimental conditions on Classical Molecular Networking workflow on sample *Halidrys siliquosa*.

| Run | # Nodes | Cluster co-efficient | Average # neighbours | # self-loop nodes | #Edges | Average Cosine score |
|-----|---------|----------------------|----------------------|-------------------|--------|----------------------|
| T1  | 1131    | 0.095                | 1.149                | 816               | 1466   | 0.917                |
| T2  | 1443    | 0.081                | 0.99                 | 1037              | 1751   | 0.929                |
| T3  | 925     | 0.177                | 2.017                | 504               | 1437   | 0.894                |
| T4  | 1373    | 0.067                | 0.721                | 1086              | 1581   | 0.944                |
| T5  | 1356    | 0.109                | 1.572                | 803               | 1869   | 0.899                |
| T6  | 1064    | 0.149                | 1.485                | 618               | 1408   | 0.901                |
| T7  | 851     | 0.174                | 1.556                | 469               | 1131   | 0.895                |
| T8  | 748     | 0.14                 | 1.463                | 497               | 1044   | 0.899                |
| T9  | 1391    | 0.092                | 0.95                 | 1083              | 1744   | 0.925                |
| T10 | 1141    | 0.15                 | 1.939                | 615               | 1721   | 0.892                |
| T11 | 1357    | 0.067                | 0.856                | 966               | 1547   | 0.932                |
| T12 | 1428    | 0.118                | 1.195                | 895               | 1748   | 0.915                |
| T13 | 763     | 0.195                | 2.168                | 381               | 1208   | 0.894                |
| T14 | 892     | 0.199                | 1.774                | 381               | 1268   | 0.887                |
| T15 | 1385    | 0.124                | 1.225                | 909               | 1757   | 0.919                |
| T16 | 860     | 0.12                 | 1.209                | 604               | 1124   | 0.914                |
| T17 | 1703    | 0.07                 | 0.794                | 1305              | 1981   | 0.932                |
| T18 | 1704    | 0.121                | 1.192                | 1088              | 2104   | 0.913                |
| T19 | 883     | 0.085                | 0.879                | 656               | 1044   | 0.94                 |
| T20 | 1271    | 0.142                | 1.405                | 826               | 1719   | 0.898                |
| T21 | 1527    | 0.093                | 0.968                | 1040              | 1779   | 0.932                |
| T22 | 898     | 0.164                | 2.011                | 471               | 1374   | 0.89                 |
| T23 | 1507    | 0.112                | 1.664                | 845               | 2099   | 0.897                |
| T24 | 1283    | 0.135                | 1.32                 | 844               | 1691   | 0.903                |
| T25 | 1024    | 0.093                | 0.908                | 760               | 1225   | 0.921                |
| T26 | 760     | 0.11                 | 1.232                | 527               | 995    | 0.906                |
| T27 | 1212    | 0.1                  | 1.101                | 860               | 1527   | 0.918                |
| T28 | 786     | 0.167                | 2.041                | 410               | 1212   | 0.892                |
| T29 | 1738    | 0.067                | 0.746                | 1331              | 1979   | 0.934                |
| T30 | 947     | 0.084                | 1.026                | 690               | 1176   | 0.916                |
| T31 | 1087    | 0.149                | 1.529                | 617               | 1448   | 0.9                  |
| T32 | 1055    | 0.088                | 0.963                | 772               | 1280   | 0.919                |
| T33 | 948     | 0.107                | 1.399                | 628               | 1291   | 0.905                |
| T34 | 1128    | 0.134                | 1.711                | 677               | 1642   | 0.903                |

Table S5: Responses of molecular networks for 34 experimental conditions on Feature-Based Molecular Networking workflow on sample *Ascidia virginea*

| Run | # Nodes | Cluster co-efficient | Average # neighbours | # self-loop nodes | #Edges | Average Cosine score |
|-----|---------|----------------------|----------------------|-------------------|--------|----------------------|
| T1  | 947     | 0.069                | 0.788                | 729               | 1102   | 0.935                |
| T2  | 1163    | 0.068                | 0.717                | 883               | 1300   | 0.946                |
| T3  | 807     | 0.131                | 1.492                | 521               | 1123   | 0.917                |
| T4  | 1201    | 0.066                | 0.664                | 944               | 1343   | 0.95                 |
| T5  | 1148    | 0.12                 | 1.287                | 672               | 1411   | 0.906                |
| T6  | 943     | 0.167                | 1.561                | 565               | 1301   | 0.9                  |
| T7  | 735     | 0.173                | 1.616                | 432               | 1026   | 0.894                |
| T8  | 646     | 0.115                | 1.031                | 474               | 807    | 0.919                |
| T9  | 1281    | 0.102                | 0.831                | 979               | 1511   | 0.927                |
| T10 | 1007    | 0.13                 | 1.472                | 622               | 1363   | 0.911                |
| T11 | 1145    | 0.053                | 0.624                | 874               | 1231   | 0.948                |
| T12 | 1222    | 0.116                | 1.275                | 768               | 1547   | 0.912                |
| T13 | 656     | 0.168                | 1.796                | 419               | 1008   | 0.899                |
| T14 | 786     | 0.18                 | 1.616                | 421               | 1056   | 0.895                |
| T15 | 1237    | 0.136                | 1.384                | 804               | 1660   | 0.912                |
| T16 | 770     | 0.121                | 1.158                | 540               | 986    | 0.907                |
| T17 | 1457    | 0.08                 | 0.729                | 1130              | 1661   | 0.933                |
| T18 | 517     | 0.495                | 2.381                | 288               | 2094   | 0.936                |
| T19 | 772     | 0.117                | 1.096                | 554               | 977    | 0.914                |
| T20 | 1075    | 0.128                | 1.146                | 746               | 1362   | 0.914                |
| T21 | 1350    | 0.131                | 1.25                 | 894               | 1738   | 0.911                |
| T22 | 752     | 0.154                | 1.739                | 448               | 1102   | 0.894                |
| T23 | 1230    | 0.139                | 1.577                | 708               | 1678   | 0.895                |
| T24 | 1043    | 0.119                | 1.141                | 707               | 1302   | 0.909                |
| T25 | 886     | 0.109                | 1.005                | 676               | 1121   | 0.915                |
| T26 | 682     | 0.102                | 0.933                | 520               | 838    | 0.92                 |
| T27 | 1003    | 0.067                | 0.704                | 782               | 1135   | 0.938                |
| T28 | 665     | 0.172                | 0.704                | 383               | 969    | 0.889                |
| T29 | 1470    | 0.08                 | 0.837                | 1123              | 1738   | 0.925                |
| T30 | 762     | 0.085                | 0.801                | 586               | 891    | 0.925                |
| T31 | 937     | 0.17                 | 1.639                | 554               | 1322   | 0.9                  |
| T32 | 937     | 0.107                | 0.95                 | 705               | 1150   | 0.921                |
| T33 | 767     | 0.101                | 0.92                 | 588               | 942    | 0.918                |
| T34 | 974     | 0.138                | 1.509                | 558               | 1293   | 0.901                |

Table S6: Responses of molecular networks for 34 experimental conditions on Feature-Based Molecular Networking workflow on sample *Parazoanthus axinellae*.

| Run | # Nodes | Cluster co-efficient | Average # neighbours | # self-loop nodes | #Edges | Average Cosine score |
|-----|---------|----------------------|----------------------|-------------------|--------|----------------------|
| T1  | 1210    | 0.09                 | 1.069                | 872               | 1519   | 0.926                |
| T2  | 1465    | 0.073                | 0.995                | 1045              | 1774   | 0.929                |
| T3  | 951     | 0.181                | 2.038                | 484               | 1453   | 0.892                |
| T4  | 1284    | 0.084                | 0.984                | 915               | 1547   | 0.918                |
| T5  | 1519    | 0.111                | 1.531                | 837               | 2000   | 0.897                |
| T6  | 1118    | 0.195                | 2.159                | 528               | 1735   | 0.877                |
| T7  | 849     | 0.2                  | 2.174                | 414               | 1337   | 0.868                |
| T8  | 756     | 0.137                | 1.534                | 478               | 1058   | 0.898                |
| T9  | 1380    | 0.093                | 1.293                | 965               | 1857   | 0.902                |
| T10 | 1157    | 0.16                 | 1.92                 | 609               | 1720   | 0.897                |
| T11 | 1411    | 0.053                | 0.755                | 1052              | 1585   | 0.939                |
| T12 | 1338    | 0.151                | 1.709                | 746               | 1889   | 0.89                 |
| T13 | 740     | 0.193                | 2.07                 | 383               | 1149   | 0.898                |
| T14 | 882     | 0.213                | 2.048                | 425               | 1328   | 0.884                |
| T15 | 1323    | 0.129                | 1.592                | 747               | 1800   | 0.899                |
| T16 | 873     | 0.179                | 1.755                | 523               | 1289   | 0.877                |
| T17 | 1651    | 0.089                | 1.045                | 1183              | 2046   | 0.916                |
| T18 | 1614    | 0.135                | 1.575                | 937               | 2208   | 0.893                |
| T19 | 799     | 0.096                | 1.111                | 561               | 1005   | 0.906                |
| T20 | 1200    | 0.151                | 1.637                | 711               | 1693   | 0.892                |
| T21 | 1555    | 0.146                | 1.631                | 422               | 2169   | 0.898                |
| T22 | 847     | 0.185                | 2.099                | 422               | 1311   | 0.884                |
| T23 | 1505    | 0.139                | 1.69                 | 837               | 2109   | 0.897                |
| T24 | 1245    | 0.132                | 1.65                 | 770               | 1797   | 0.895                |
| T25 | 1140    | 0.133                | 1.339                | 724               | 1487   | 0.902                |
| T26 | 774     | 0.116                | 1.336                | 515               | 1032   | 0.904                |
| T27 | 1179    | 0.077                | 0.938                | 884               | 1437   | 0.926                |
| T28 | 743     | 0.196                | 2.027                | 372               | 1125   | 0.886                |
| T29 | 1671    | 0.089                | 1.065                | 1134              | 2024   | 0.914                |
| T30 | 874     | 0.075                | 0.847                | 666               | 1036   | 0.935                |
| T31 | 998     | 0.17                 | 1.908                | 684               | 1491   | 0.887                |
| T32 | 996     | 0.112                | 1.367                | 684               | 1365   | 0.893                |
| T33 | 930     | 0.097                | 1.151                | 651               | 1186   | 0.917                |
| T34 | 1190    | 0.15                 | 1.837                | 644               | 1737   | 0.895                |

Table S7: Responses of molecular networks for 34 experimental conditions on Feature-Based Molecular Networking workflow on sample *Halidrys siliquosa*.

## Analysis of Results (Minitab)

| MN Workflow   | Sample                                 | Model                      | R <sup>2</sup> | R <sup>2</sup> (adjusted) | R <sup>2</sup> (predicted) | PRESS     | S         | P     |
|---------------|----------------------------------------|----------------------------|----------------|---------------------------|----------------------------|-----------|-----------|-------|
| Classical     | <i>Ascidia virginea</i><br>10101       | Number of Nodes*           | 99.88          | 99.35                     | 95.33                      | 0.0002182 | 0.0009566 | <0.01 |
|               |                                        | Cluster Co-efficient       | 89.49          | 42.18                     | 0                          | 80.2331   | 0.680872  | 0.218 |
|               |                                        | Number of neighbours       | 85.88          | 22.34                     | 0                          | 170.753   | 0.879827  | 0.378 |
|               |                                        | Number of Self-loop Nodes* | 99.05          | 94.79                     | 62.65                      | 17433.9   | 8.58172   | <0.01 |
|               |                                        | Number of Edges*           | 99.54          | 97.48                     | 86.15                      | 0.564805  | 0.558403  | <0.01 |
|               |                                        | Average Cosine score       | 97.22          | 84.72                     | 0                          | 0.0123225 | 0.0075031 | <0.01 |
|               | <i>Parazoanthus axinellae</i><br>10128 | Number of Nodes*           | 99.36          | 96.5                      | 75.35                      | 38873.7   | 12.9335   | <0.01 |
|               |                                        | Cluster Co-efficient       | 83.33          | 8.32                      | 0                          | 11.7632   | 0.23887   | 0.491 |
|               |                                        | Number of neighbours       | 94.11          | 67.58                     | 0                          | 3.85937   | 0.137489  | 0.059 |
|               |                                        | Number of Self-loop Nodes* | 99.14          | 95.27                     | 72.69                      | 12459.8   | 8.08934   | <0.01 |
|               |                                        | Number of Edges*           | 98.21          | 90.14                     | 41.24                      | 192877    | 31.3114   | <0.01 |
|               |                                        | Average Cosine score*      | 97.66          | 87.11                     | 58.51                      | 0.0031096 | 0.0054111 | <0.01 |
|               | <i>Halidrys siliquosa</i><br>10186     | Number of Nodes*           | 98.93          | 94.1                      | 56.12                      | 28551867  | 340.949   | <0.01 |
|               |                                        | Cluster Co-efficient       | 89.91          | 44.51                     | 0                          | 0.199414  | 0.0288213 | 0.201 |
|               |                                        | Number of neighbours       | 98.05          | 89.26                     | 4.54313                    | 4.54313   | 0.136196  | <0.01 |
|               |                                        | Number of Self-loop Nodes* | 98.02          | 89.12                     | 21.52                      | 0.0063274 | 0.0051559 | <0.01 |
|               |                                        | Number of Edges*           | 99.11          | 95.09                     | 64.03                      | 0.904868  | 0.0611518 | <0.01 |
|               |                                        | Average Cosine score       | 90             | 45.01                     | 0                          | 0.039424  | 0.0128541 | 0.201 |
| Feature-Based | <i>Ascidia virginea</i><br>10101       | Number of Nodes*           | 99.95          | 99.75%                    | 98.2                       | 50695.7   | 14.7346   | <0.01 |
|               |                                        | Cluster Co-efficient*      | 99.3           | 96.13                     | 73.19                      | 0.0122798 | 0.0073247 | <0.01 |
|               |                                        | Number of neighbours*      | 99.61          | 97.83                     | 86.24                      | 0.763922  | 0.0604292 | <0.01 |
|               |                                        | Number of Self-loop Nodes* | 99.96          | 99.77                     | 98.55                      | 30585.9   | 98.55     | <0.01 |
|               |                                        | Number of Edges*           | 99.78          | 98.8                      | 91.52                      | 278493    | 91.5      | <0.01 |
|               |                                        | Average Cosine score*      | 99.71          | 98.41                     | 93.73                      | 0.000521  | 0.002     | <0.01 |
|               | <i>Parazoanthus axinellae</i><br>10128 | Number of Nodes            | 94.46          | 69.55                     | 0                          | 1.87E+13  | 276342    | 0.05  |
|               |                                        | Cluster Co-efficient*      | 98.26          | 90.45                     | 30.52                      | 278.027   | 1.07589   | <0.01 |
|               |                                        | Number of neighbours       | 94.55          | 70.01                     | 0                          | 7.60682   | 0.175936  | 0.049 |
|               |                                        | Number of Self-loop Nodes* | 98.51          | 91.8                      | 40.63                      | 1697325   | 84.2852   | <0.01 |
|               |                                        | Number of Edges*           | 99.62          | 97.9                      | 86.33                      | 0.0000484 | 0.000475  | <0.01 |
|               |                                        | Average Cosine score       | 96.94          | 83.17                     | 0                          | 0.0112007 | 0.0068828 | 0.011 |
|               | <i>Halidrys siliquosa</i><br>10186     | Number of Nodes*           | 99.85          | 99.19                     | 94.57                      | 0         | 0         | <0.01 |
|               |                                        | Cluster Co-efficient*      | 98.27          | 90.5                      | 34.11                      | 226.096   | 0.994139  | <0.01 |
|               |                                        | Number of neighbours*      | 99.87          | 99.29                     | 94.72                      | 0.245578  | 0.0316518 | <0.01 |
|               |                                        | Number of Self-loop Nodes  | 96.56          | 81.08                     | 0                          | 5.23E+12  | 147923    | 0.015 |
|               |                                        | Number of Edges*           | 99.47          | 97.1                      | 82.64                      | 116.255   | 0.767847  | <0.01 |
|               |                                        | Average Cosine score*      | 99.25          | 95.87                     | 70.01                      | 0.0044473 | 0.0043076 | <0.01 |

Table S8: R<sup>2</sup>, R<sup>2</sup> (predicted), R<sup>2</sup> (adjusted), PRESS, S and P statistical values of response models for three samples and two workflows. Models included in summary analysis are indicated with an asterisk. Models highlighted in red were excluded from final analysis because non-significant (R<sup>2</sup><20).

## DOE reports

## Classical Molecular Networking

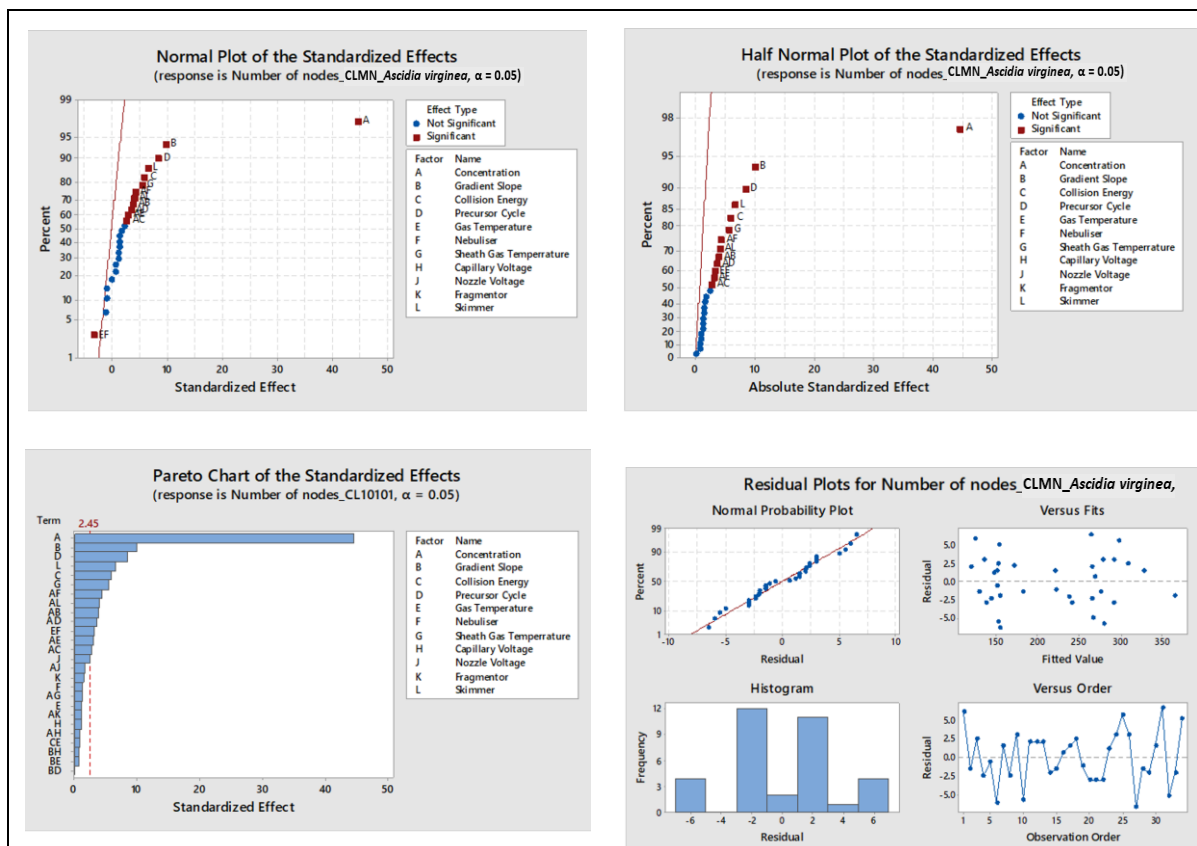

Figure S4: DOE reports for number of node model in Classical Molecular Networking of *Ascidia virginea*, normal plot of standardized effects (top left), half normal plot of standardized effects (top right), pareto chart of standardized effects (bottom left), and residual plots (bottom right).

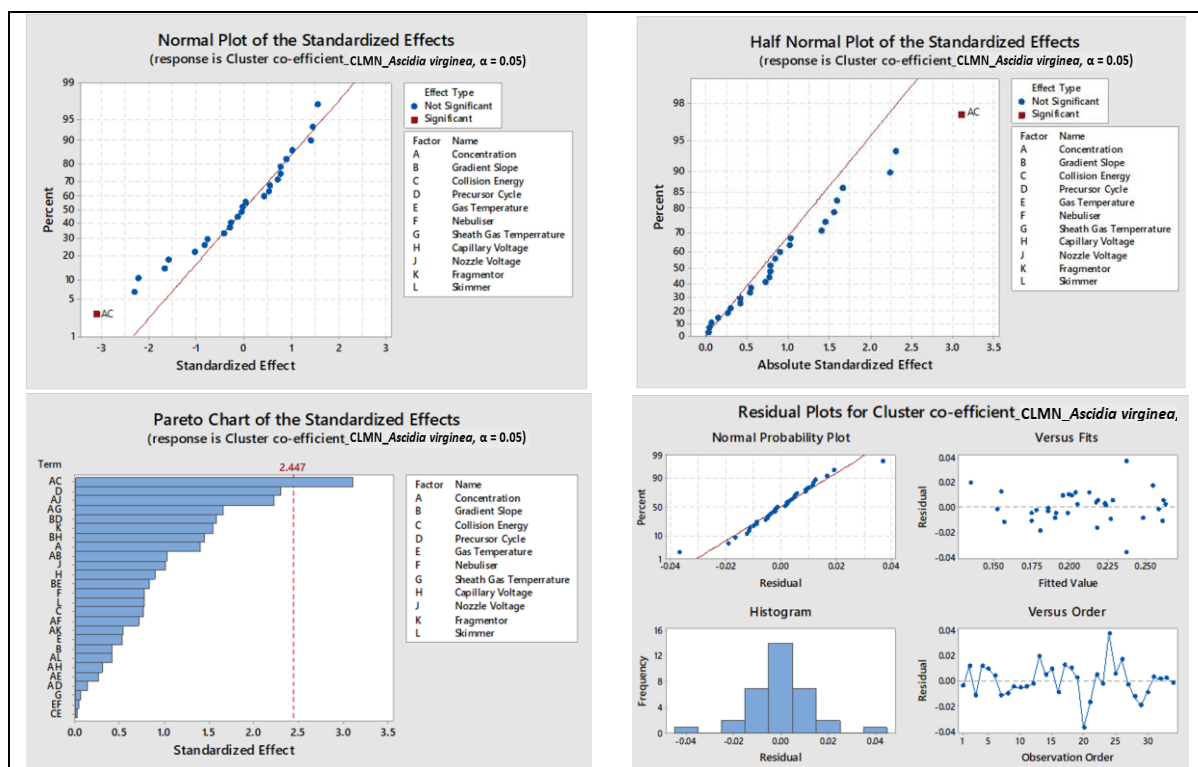

Figure S5: DOE reports for cluster co-efficient model in Classical Molecular Networking of *Ascidia virginea*, normal plot of standardized effects (top left), half normal plot of standardized effects (top right), pareto chart of standardized effects (bottom left), and residual plots (bottom right).

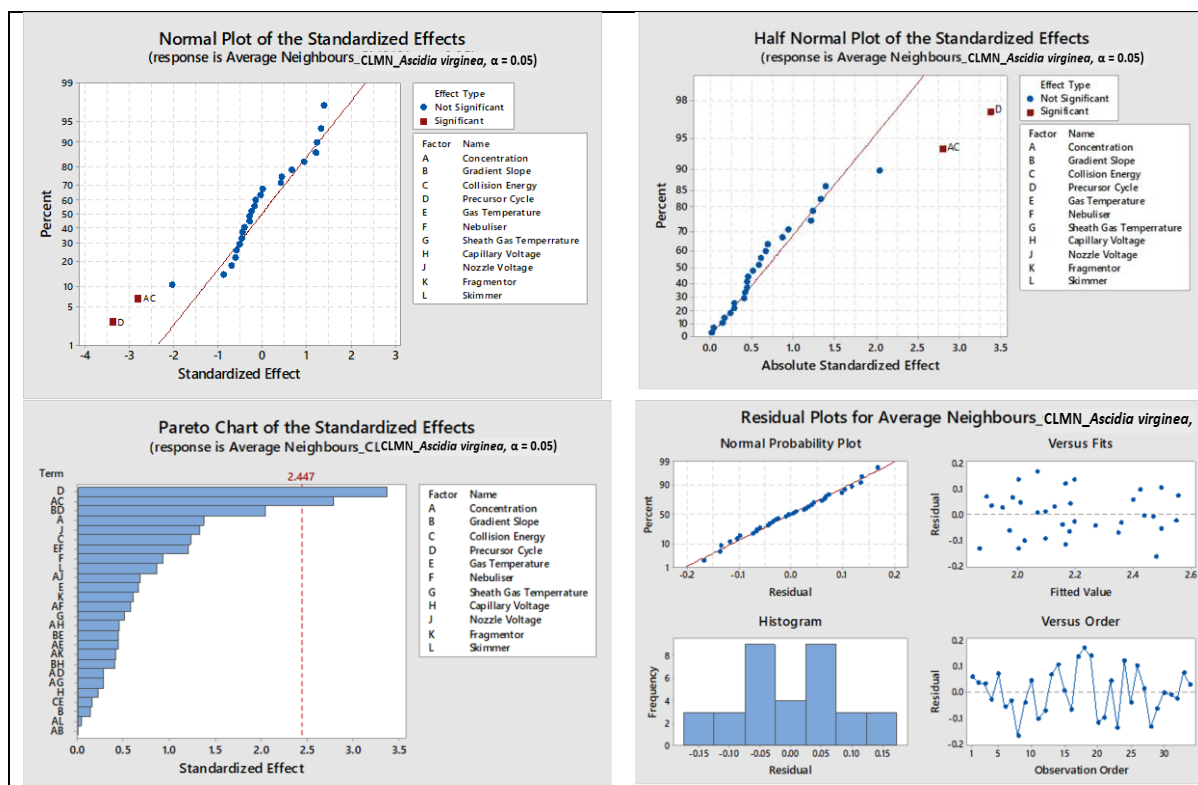

Figure S6: DOE reports for average number of neighbours model in Classical Molecular Networking of *Ascidia virginea*, normal plot of standardized effects (top left), half normal plot of standardized effects (top right), pareto chart of standardized effects (bottom left), and residual plots (bottom right).



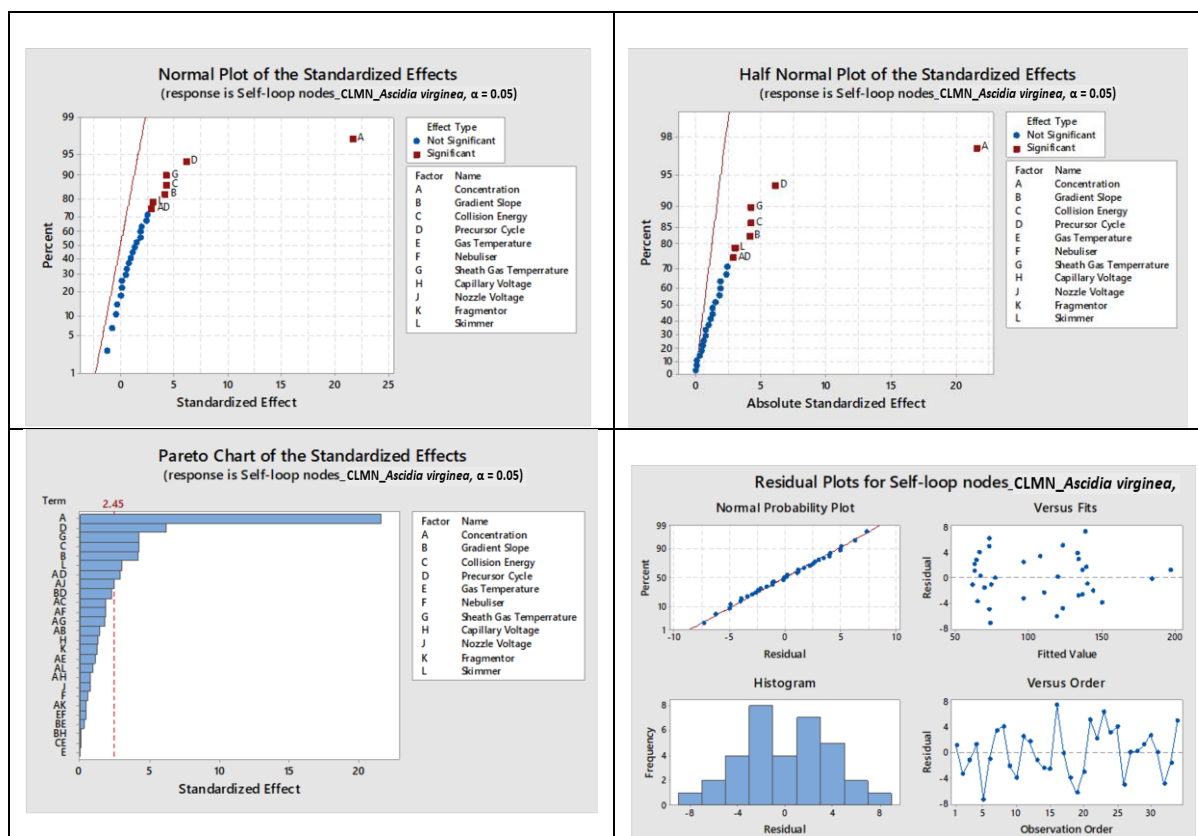

Figure S7: DOE reports for number of self-loop nodes model in Classical Molecular Networking of *Ascidia virginea*, normal plot of standardized effects (top left), half normal plot of standardized effects (top right), pareto chart of standardized effects (bottom left), and residual plots (bottom right).

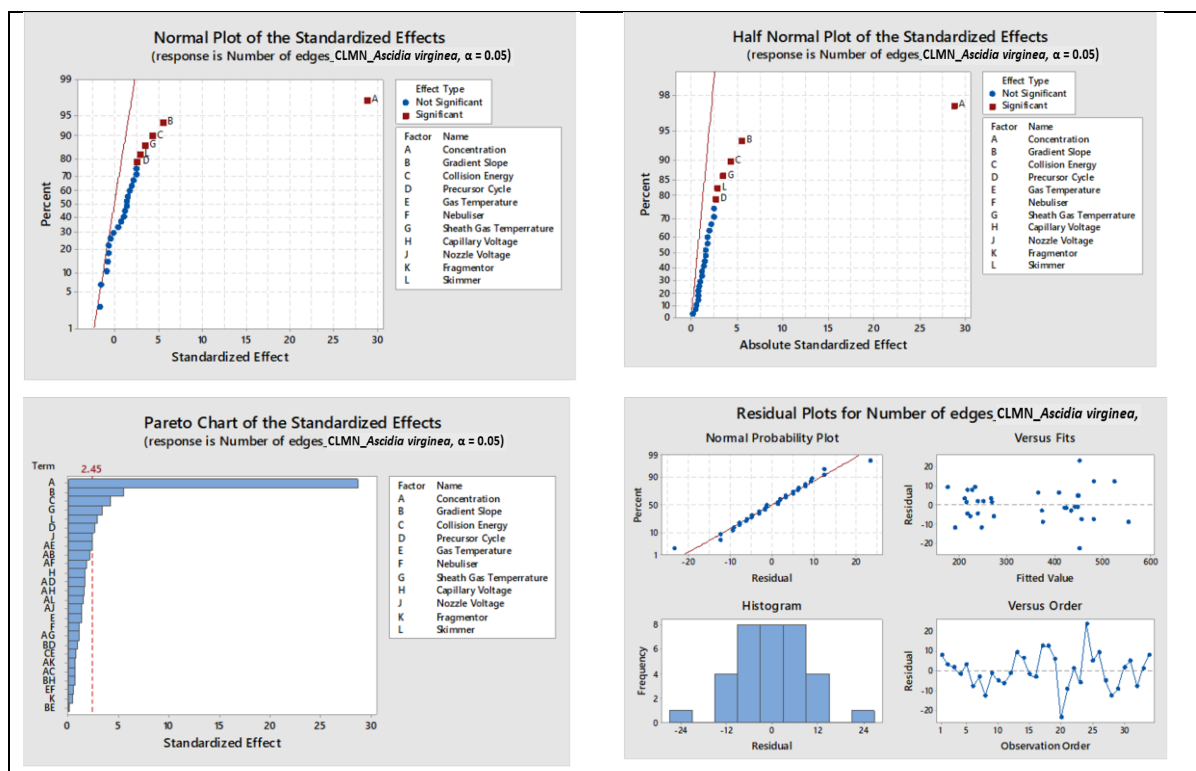

Figure S8: DOE reports for number of edges model in Classical Molecular Networking of *Ascidia virginea*, normal plot of standardized effects (top left), half normal plot of standardized effects (top right), pareto chart of standardized effects (bottom left), and residual plots (bottom right).

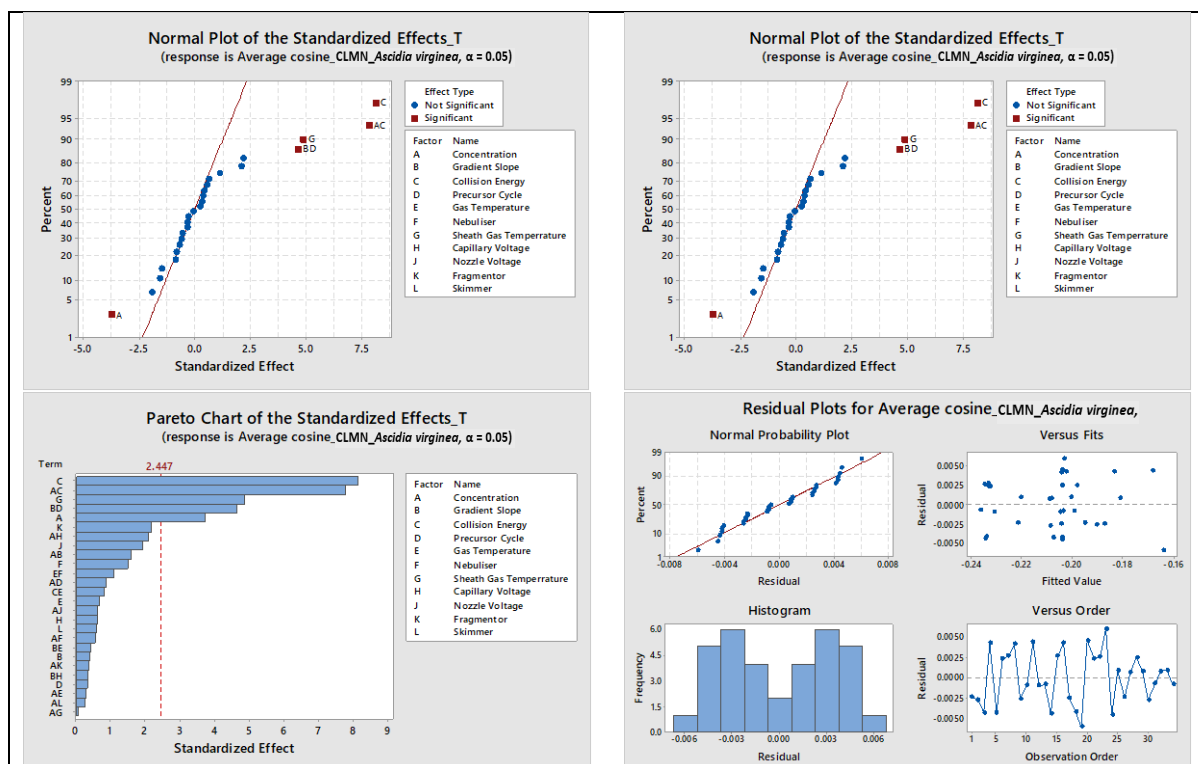

Figure S9: DOE reports for average cosine score model in Classical Molecular Networking of *Ascidia virginea*, normal plot of standardized effects (top left), half normal plot of standardized effects (top right), pareto chart of standardized effects (bottom left), and residual plots (bottom right).

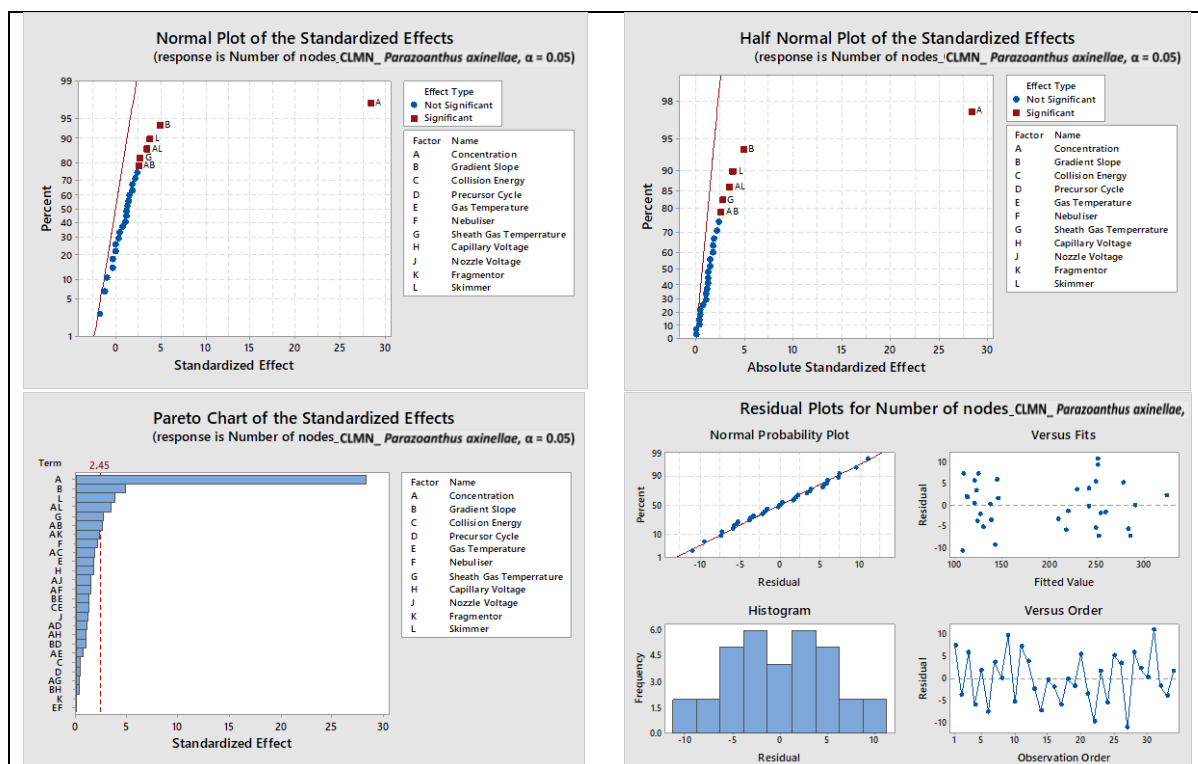

Figure S10: DOE reports for number of nodes model in Classical Molecular Networking of *Parazoanthus axinellae*, normal plot of standardized effects (top left), half normal plot of standardized effects (top right), pareto chart of standardized effects (bottom left), and residual plots (bottom right).

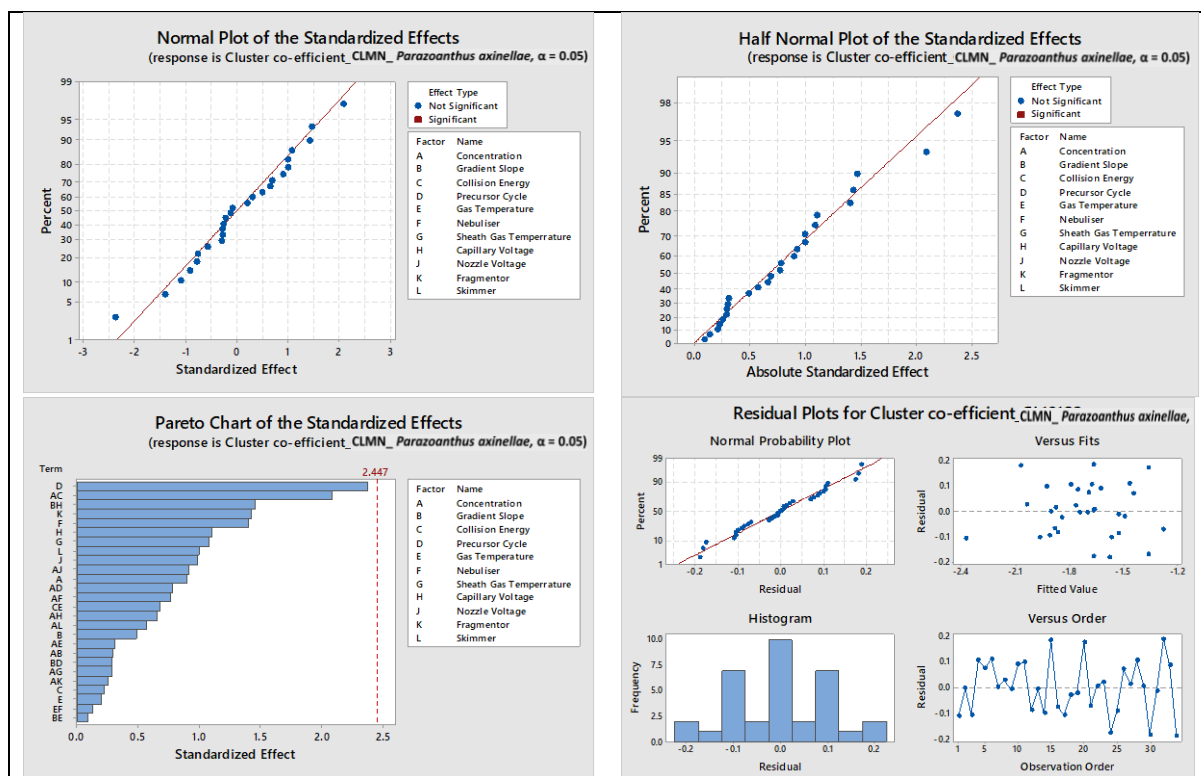

Figure S11: DOE reports for cluster co-efficient model in Classical Molecular Networking of *Parazoanthus axinellae*, normal plot of standardized effects (top left), half normal plot of standardized effects (top right), pareto chart of standardized effects (bottom left), and residual plots (bottom right).

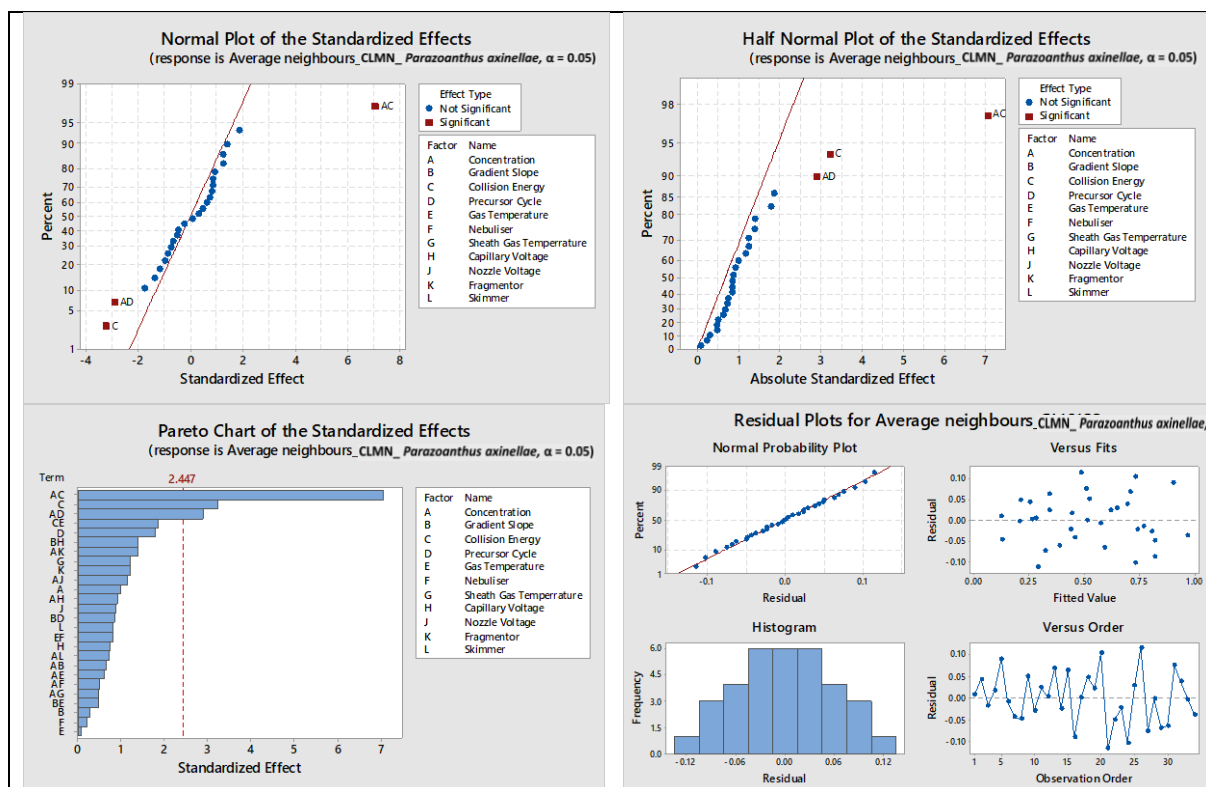

Figure S12: DOE reports for average number of neighbours model in Classical Molecular Networking of *Parazoanthus axinellae*, normal plot of standardized effects (top left), half normal plot of standardized effects (top right), pareto chart of standardized effects (bottom left), and residual plots (bottom right).

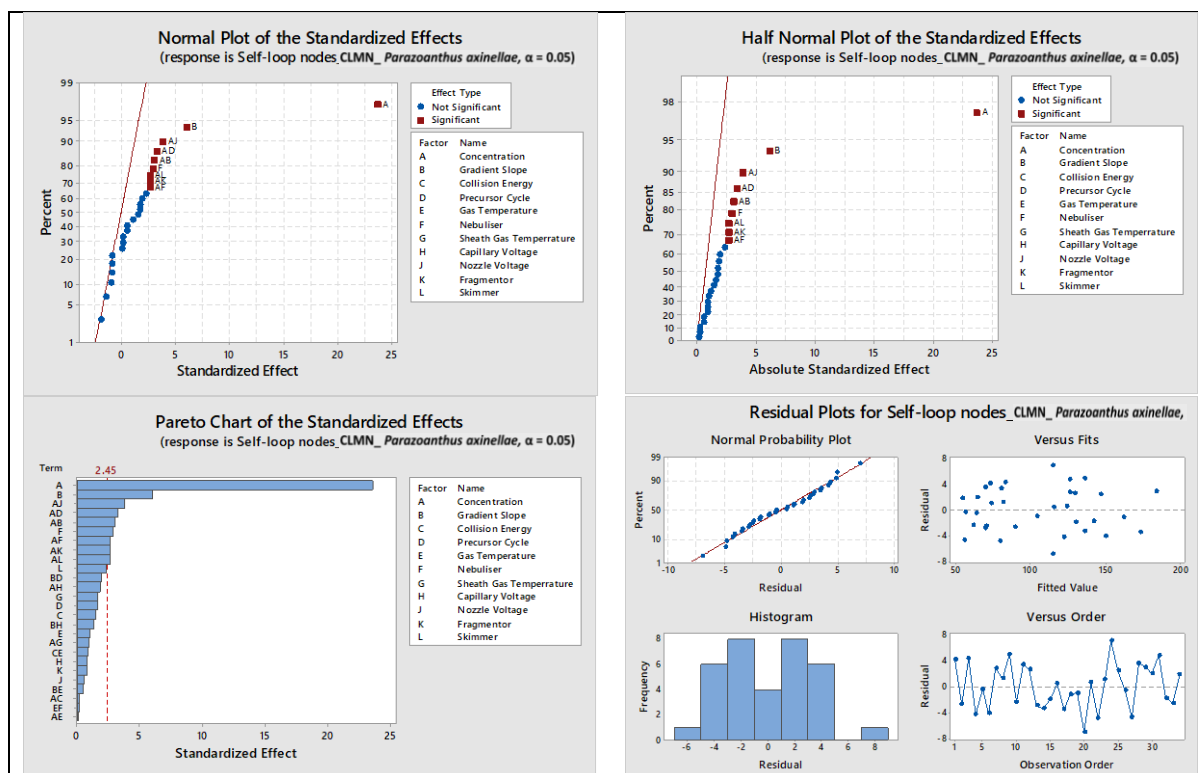

Figure S13: DOE reports for number of self-loop nodes model in Classical Molecular Networking of *Parazoanthus axinellae*, normal plot of standardized effects (top left), half normal plot of standardized effects (top right), pareto chart of standardized effects (bottom left), and residual plots (bottom right).

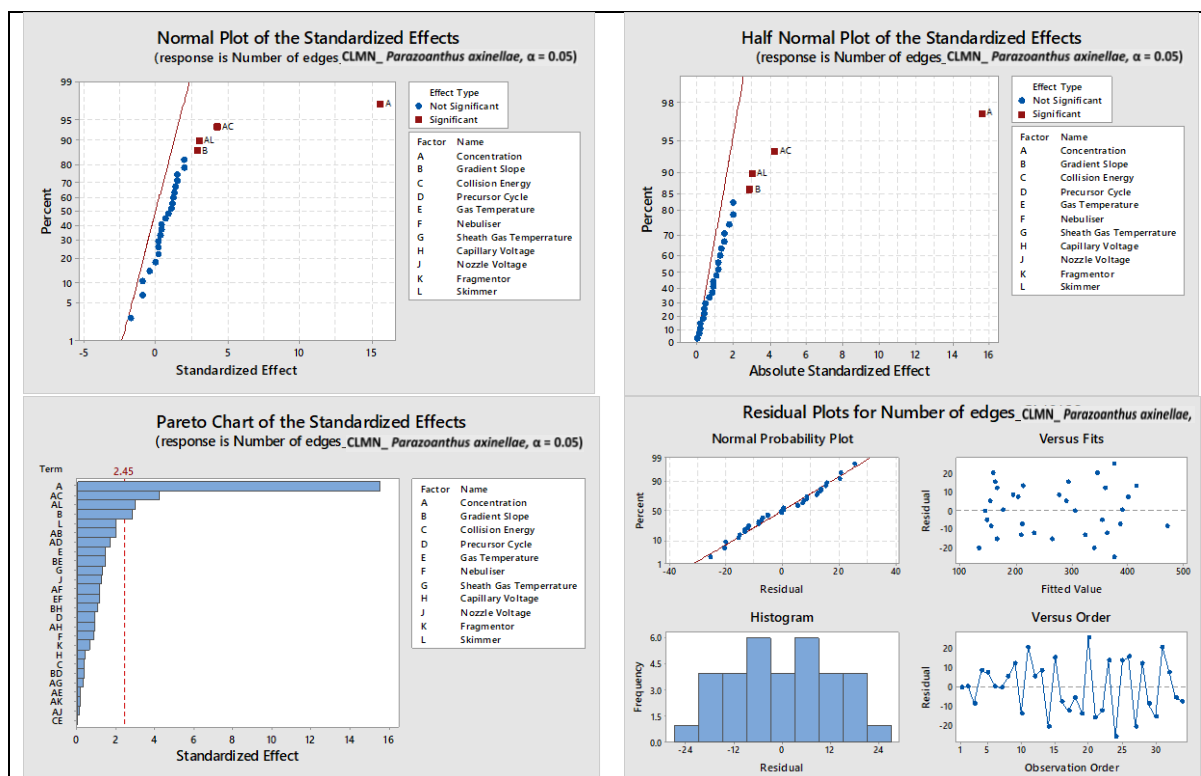

Figure S14: DOE reports for number of edges model in Classical Molecular Networking of *Parazoanthus axinellae*, normal plot of standardized effects (top left), half normal plot of standardized effects (top right), pareto chart of standardized effects (bottom left), and residual plots (bottom right).



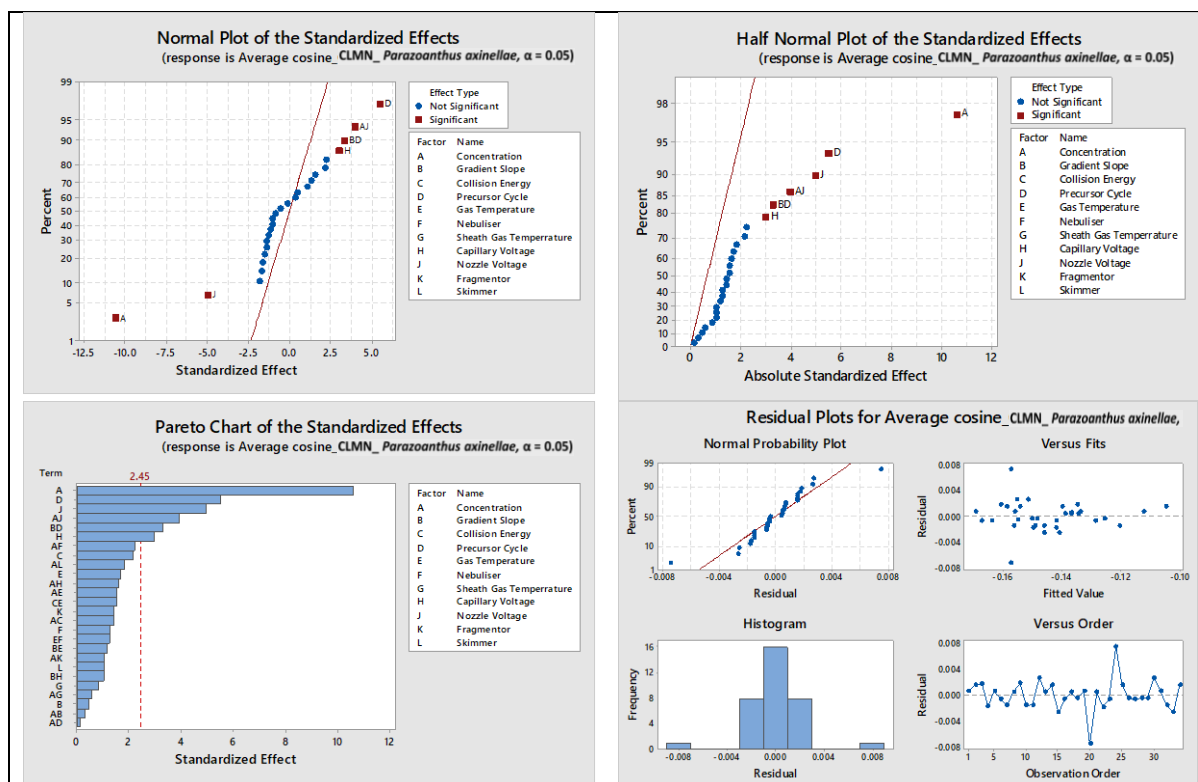

Figure S15: DOE reports for average cosine score model in Classical Molecular Networking of *Parazoanthus axinellae*, normal plot of standardized effects (top left), half normal plot of standardized effects (top right), pareto chart of standardized effects (bottom left), and residual plots (bottom right).

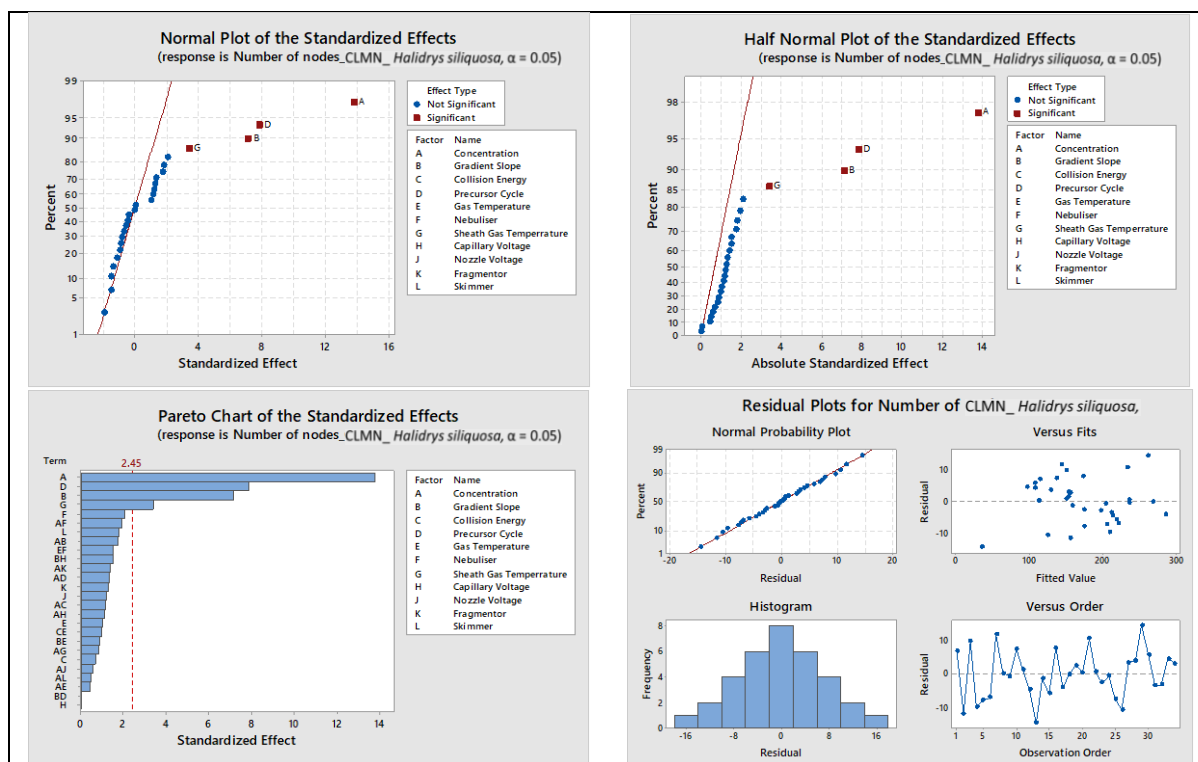

Figure S16: DOE reports for number of nodes model in Classical Molecular Networking of *Halidrys siliquosa*, normal plot of standardized effects (top left), half normal plot of standardized effects (top right), pareto chart of standardized effects (bottom left), and residual plots (bottom right).

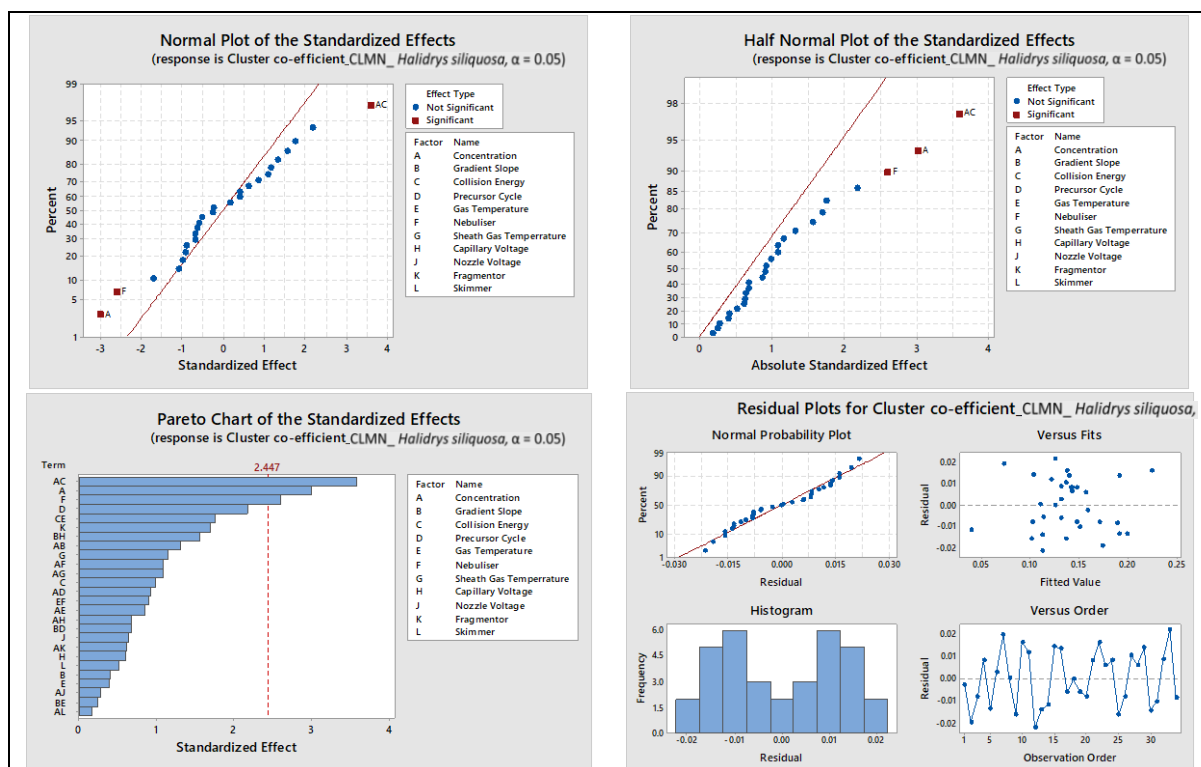

Figure S17: DOE reports for cluster co-efficient model in Classical Molecular Networking of *Halidrys siliquosa*, normal plot of standardized effects (top left), half normal plot of standardized effects (top right), pareto chart of standardized effects (bottom left), and residual plots (bottom right).

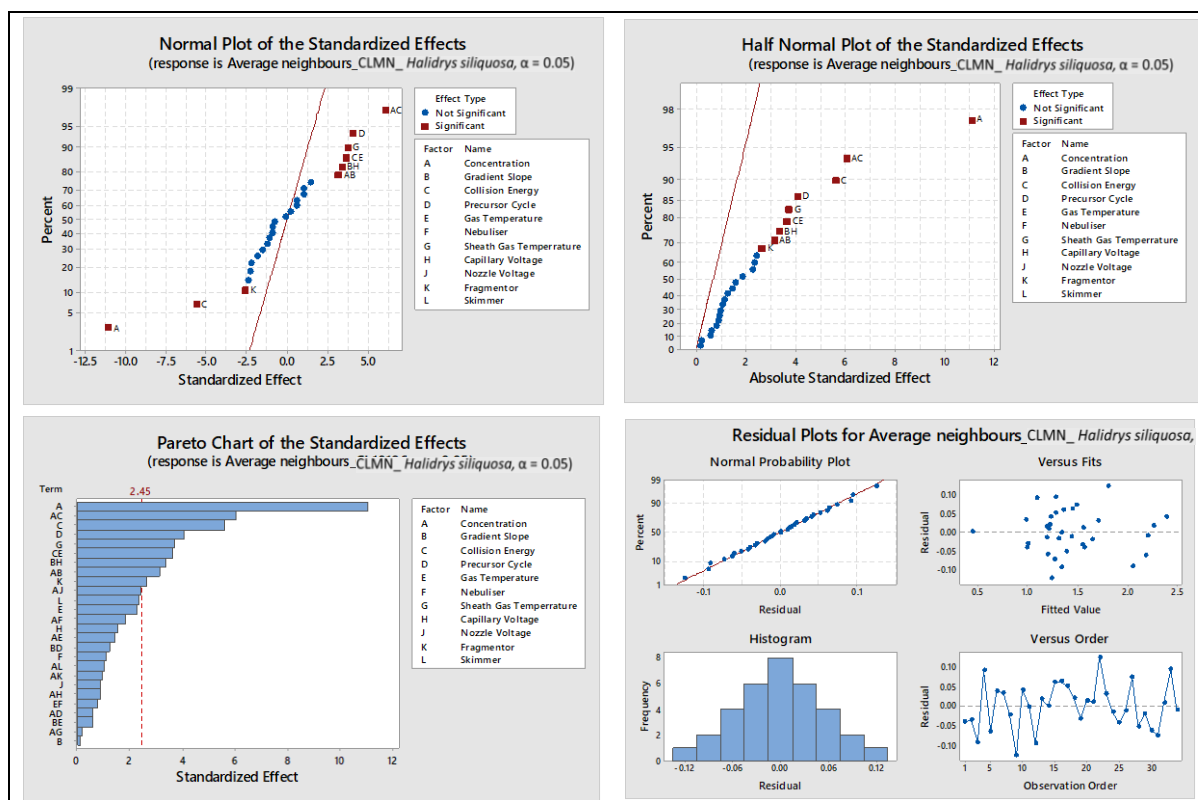

Figure S18: DOE reports for average number of neighbours model in Classical Molecular Networking of *Halidrys siliquosa*, normal plot of standardized effects (top left), half normal plot of standardized effects (top right), pareto chart of standardized effects (bottom left), and residual plots (bottom right).

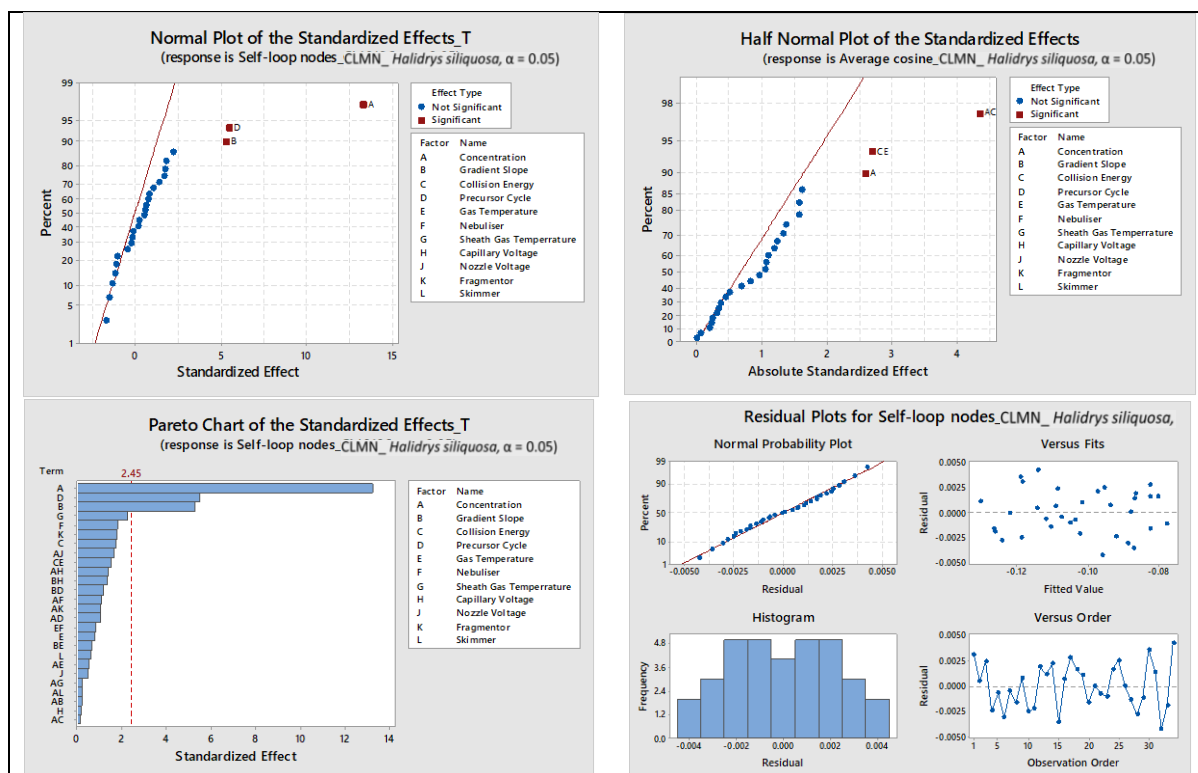

Figure S19: DOE reports for number of self-loop nodes model in Classical Molecular Networking of *Halidrys siliquosa*, normal plot of standardized effects (top left), half normal plot of standardized effects (top right), pareto chart of standardized effects (bottom left), and residual plots (bottom right).

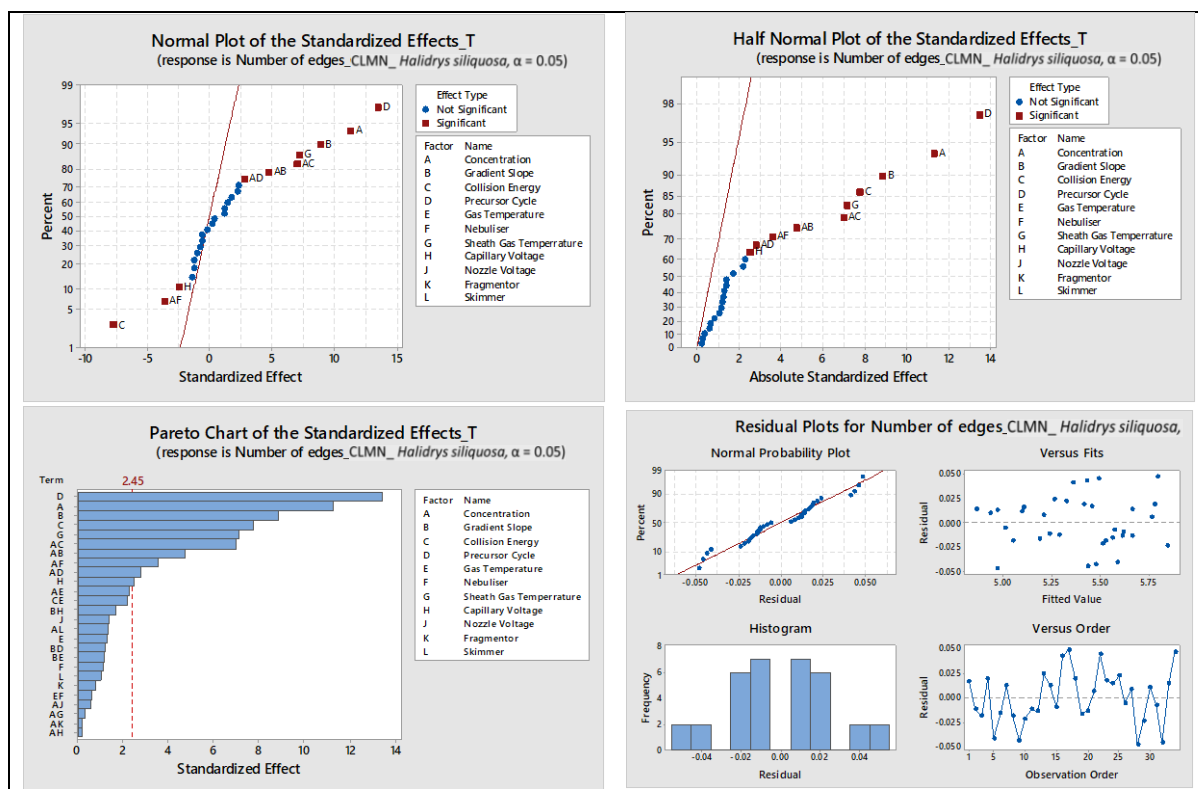

Figure S20: DOE reports for number of nodes model in Classical Molecular Networking of *Halidrys siliquosa*, normal plot of standardized effects (top left), half normal plot of standardized effects (top right), pareto chart of standardized effects (bottom left), and residual plots (bottom right).

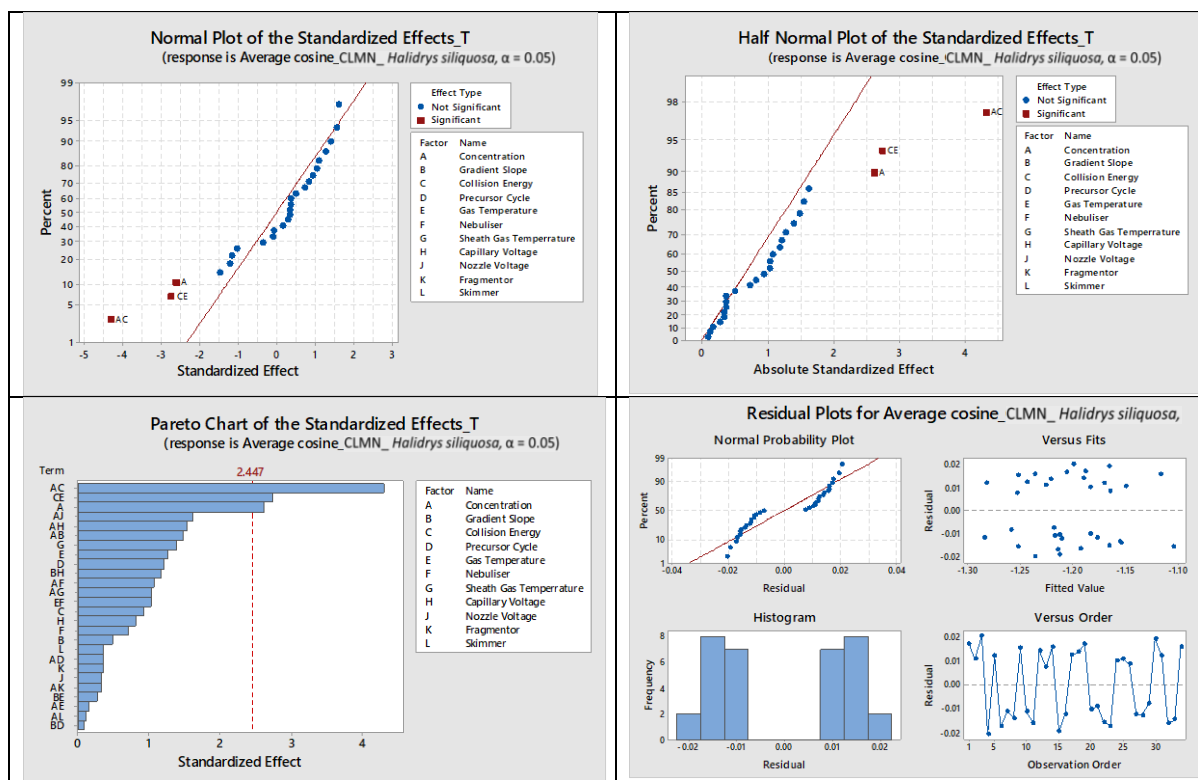

Figure S21: DOE reports for average cosine model in Classical Molecular Networking of *Halidrys siliquosa*, normal plot of standardized effects (top left), half normal plot of standardized effects (top right), pareto chart of standardized effects (bottom left), and residual plots (bottom right).

## Feature-Based Molecular Networking

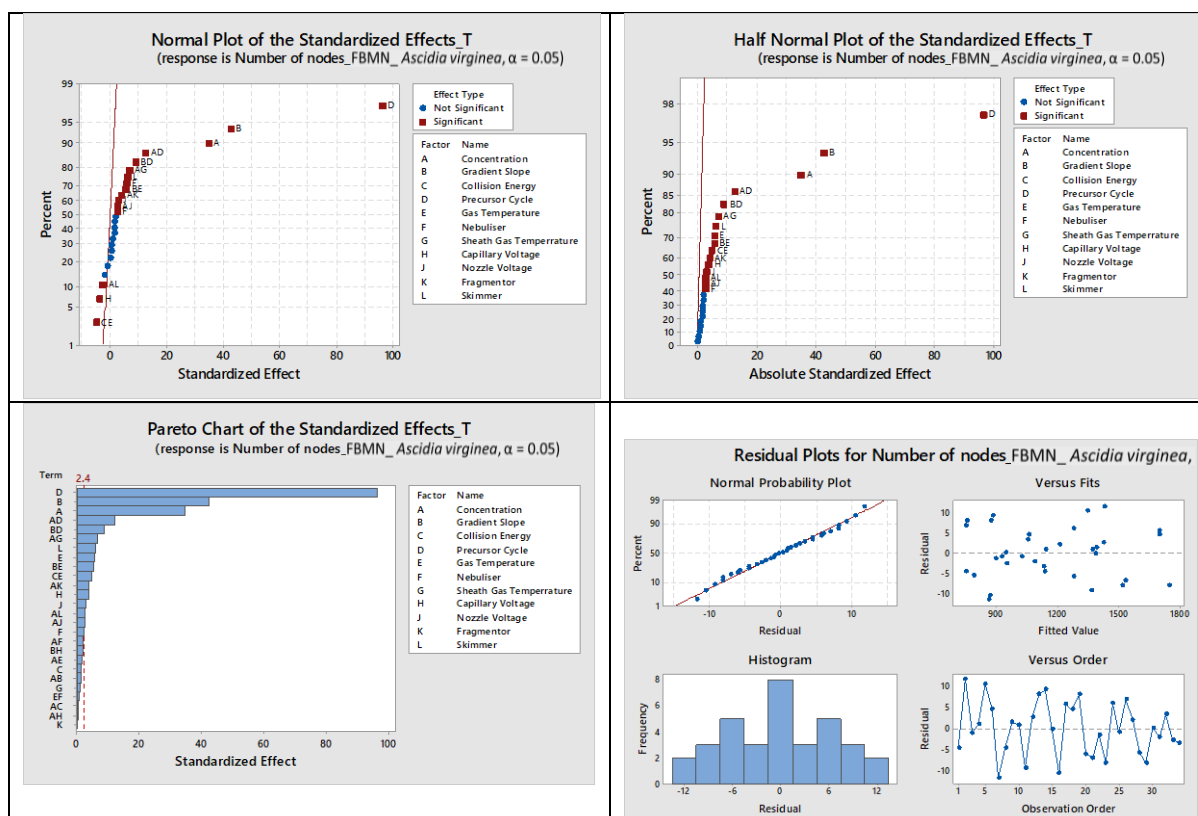

Figure S22: DOE reports for number of node model in Feature-Based Molecular Networking of *Ascidia virginea*, normal plot of standardized effects (top left), half normal plot of standardized effects (top right), pareto chart of standardized effects (bottom left), and residual plots (bottom right).



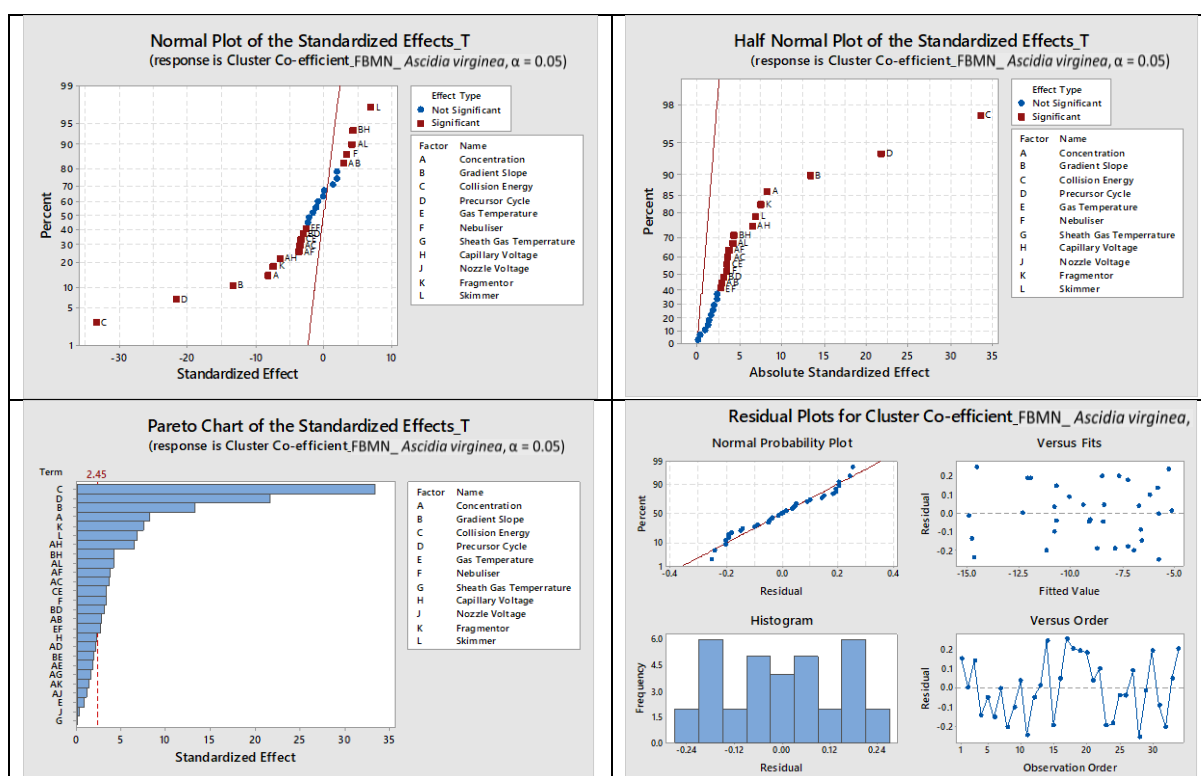

Figure S23: DOE reports for cluster co-efficient model in Feature-Based Molecular Networking of *Ascidia virginea*, normal plot of standardized effects (top left), half normal plot of standardized effects (top right), pareto chart of standardized effects (bottom left), and residual plots (bottom right).

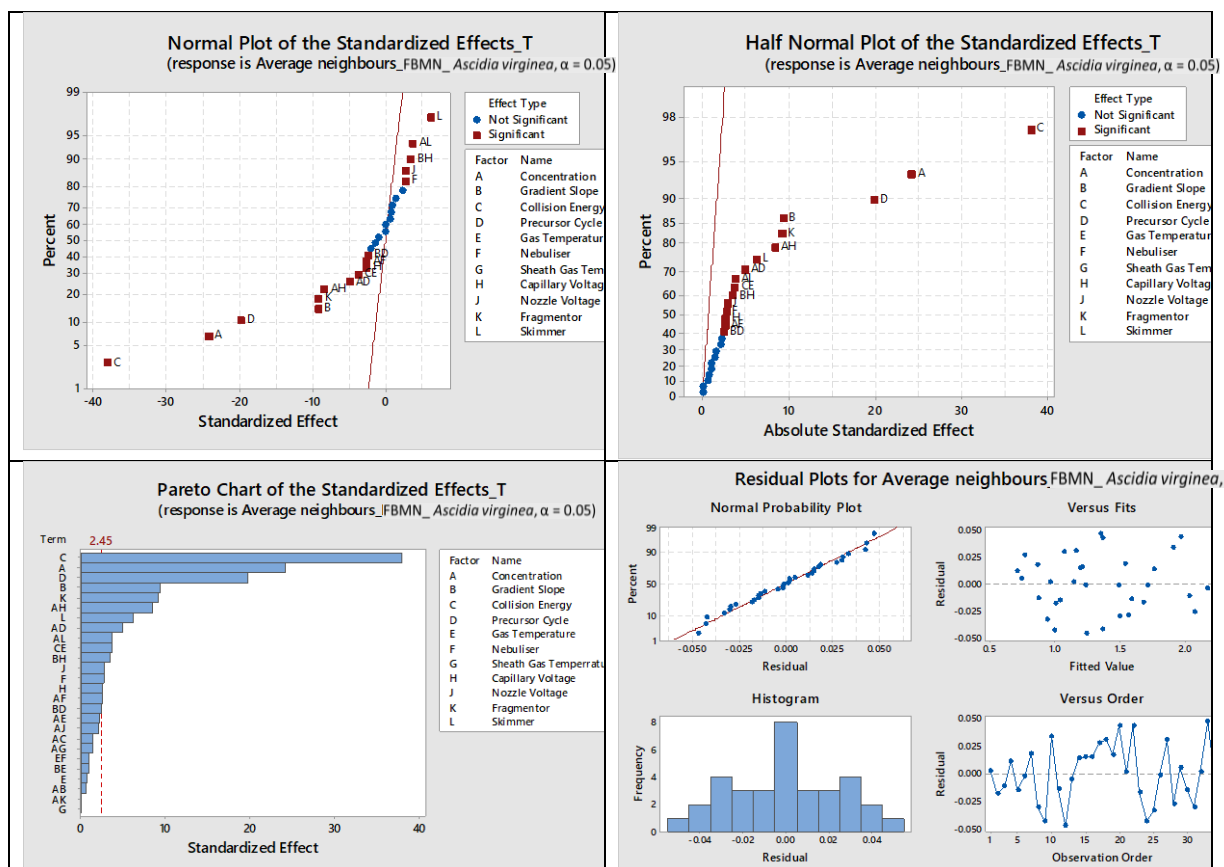

Figure S24: DOE reports for average number of neighbours model in Feature-Based Molecular Networking of *Ascidia virginea*, normal plot of standardized effects (top left), half normal plot of standardized effects (top right), pareto chart of standardized effects (bottom left), and residual plots (bottom right).

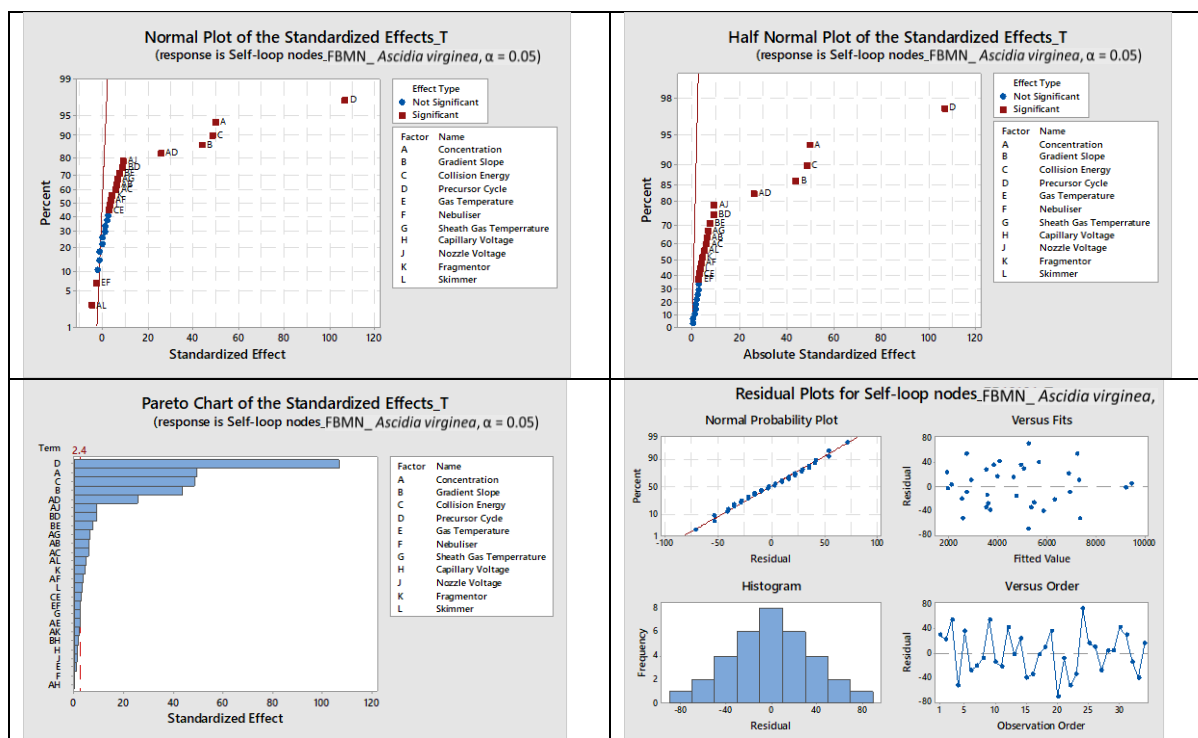

Figure S25: DOE reports for number of self-loop nodes model in Feature-Based Molecular Networking of *Ascidia virginea*, normal plot of standardized effects (top left), half normal plot of standardized effects (top right), pareto chart of standardized effects (bottom left), and residual plots (bottom right).

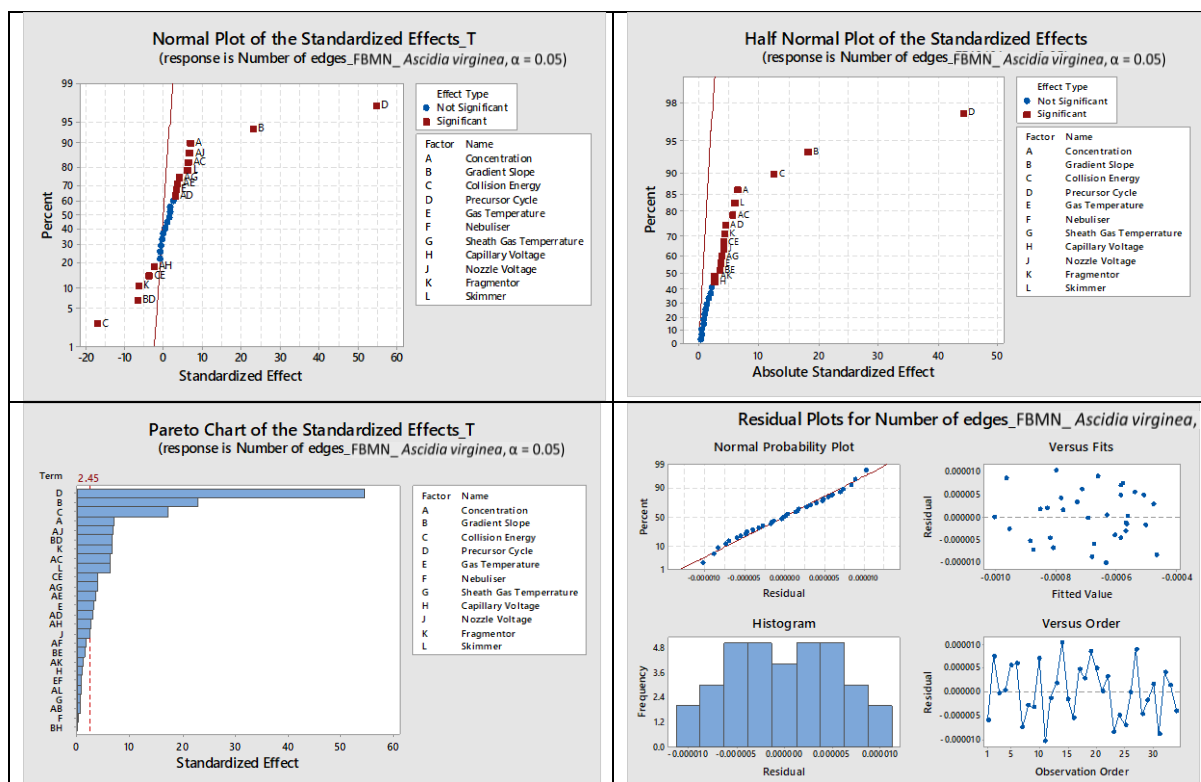

Figure S26: DOE reports for number of edges model in Feature-Based Molecular Networking of *Ascidia virginea*, normal plot of standardized effects (top left), half normal plot of standardized effects (top right), pareto chart of standardized effects (bottom left), and residual plots (bottom right).

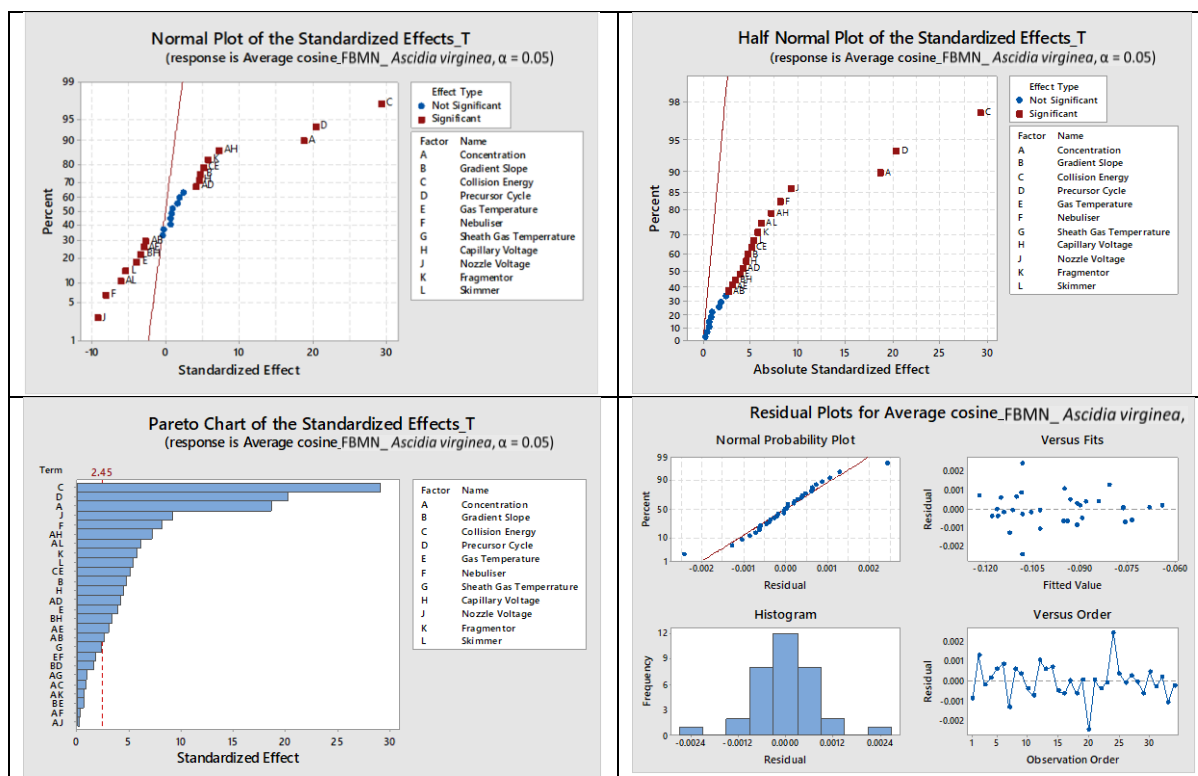

Figure S27: DOE reports for average cosine score model in Feature-Based Molecular Networking of *Ascidia virginea*, normal plot of standardized effects (top left), half normal plot of standardized effects (top right), pareto chart of standardized effects (bottom left), and residual plots (bottom right).

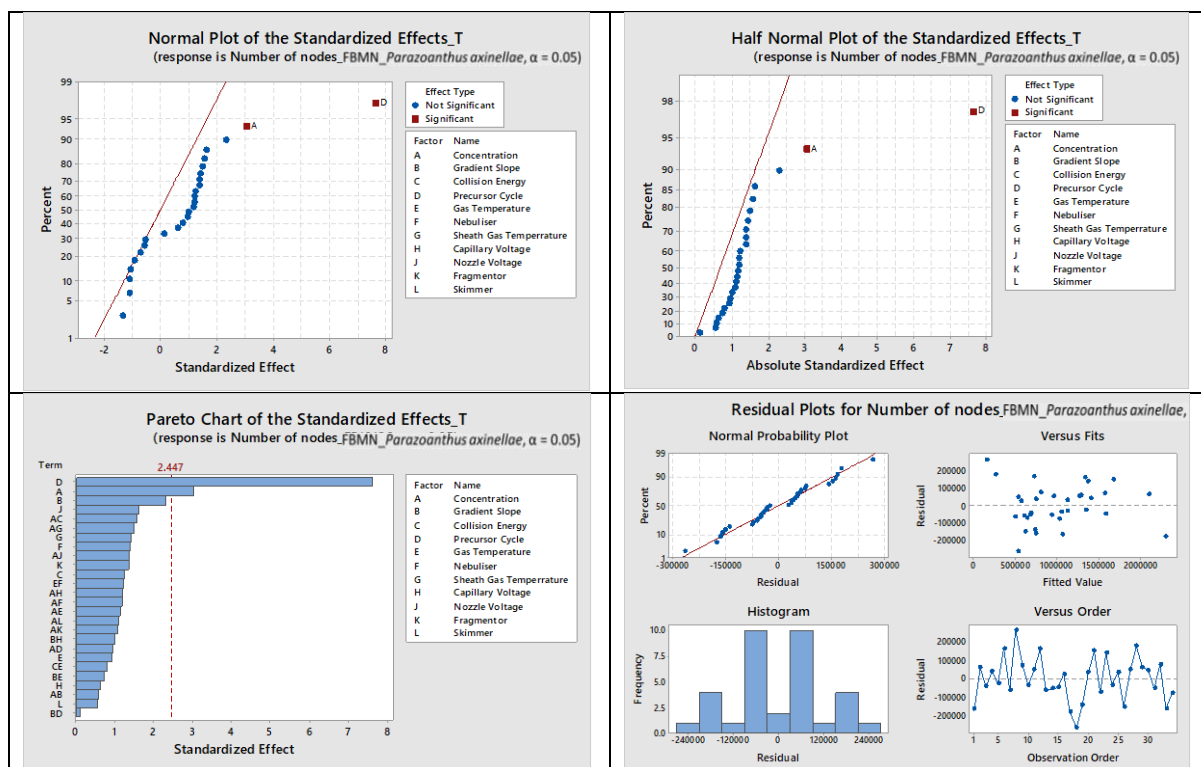

Figure S28: DOE reports for number of node model in Feature-Based Molecular Networking of *Parazoanthus axinellae*, normal plot of standardized effects (top left), half normal plot of standardized effects (top right), pareto chart of standardized effects (bottom left), and residual plots (bottom right).

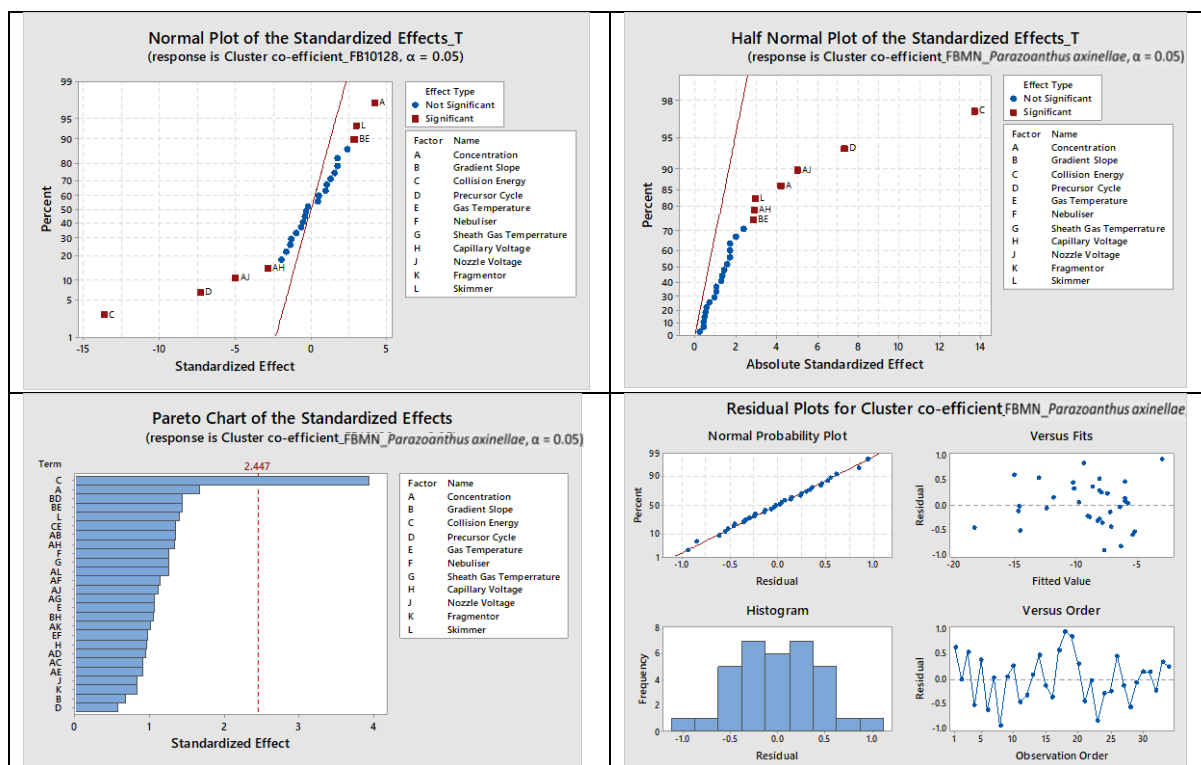

Figure S29: DOE reports for cluster co-efficient model in Feature-Based Molecular Networking of *Parazoanthus axinellae*, normal plot of standardized effects (top left), half normal plot of standardized effects (top right), pareto chart of standardized effects (bottom left), and residual plots (bottom right).

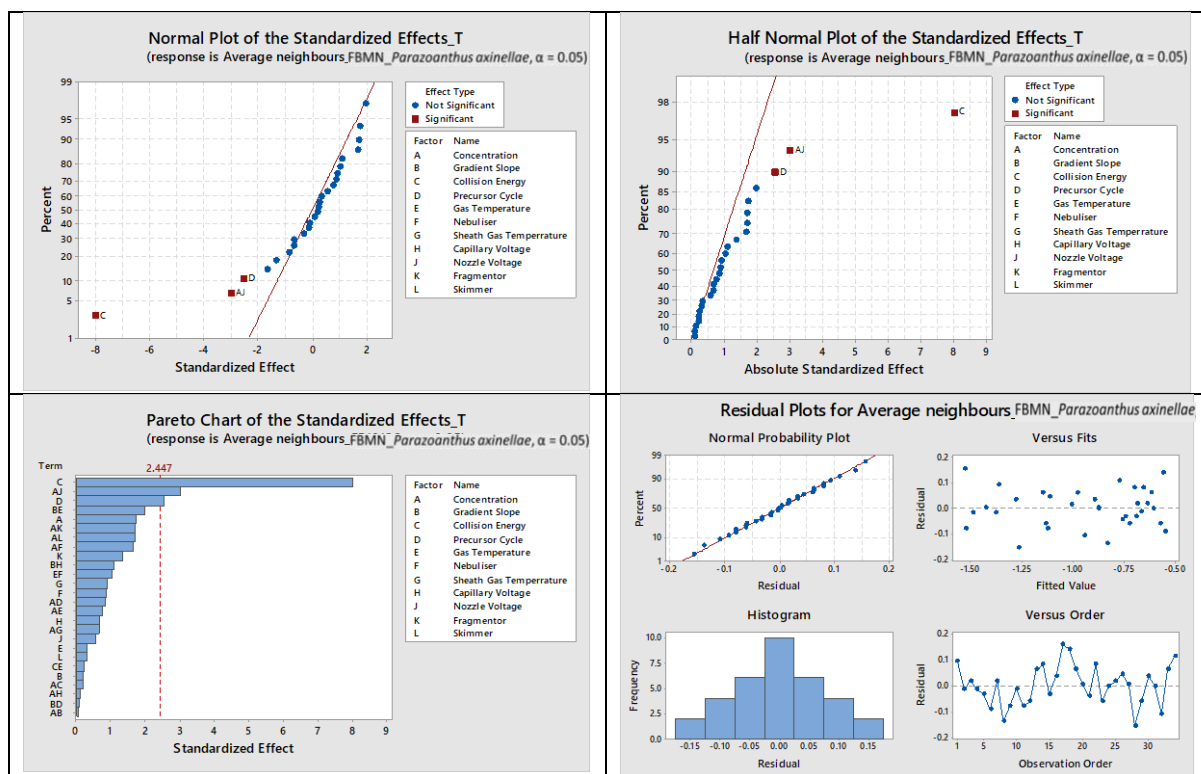

Figure S30: DOE reports for average number of neighbours model in Feature-Based Molecular Networking of *Parazoanthus axinellae*, normal plot of standardized effects (top left), half normal plot of standardized effects (top right), pareto chart of standardized effects (bottom left), and residual plots (bottom right).



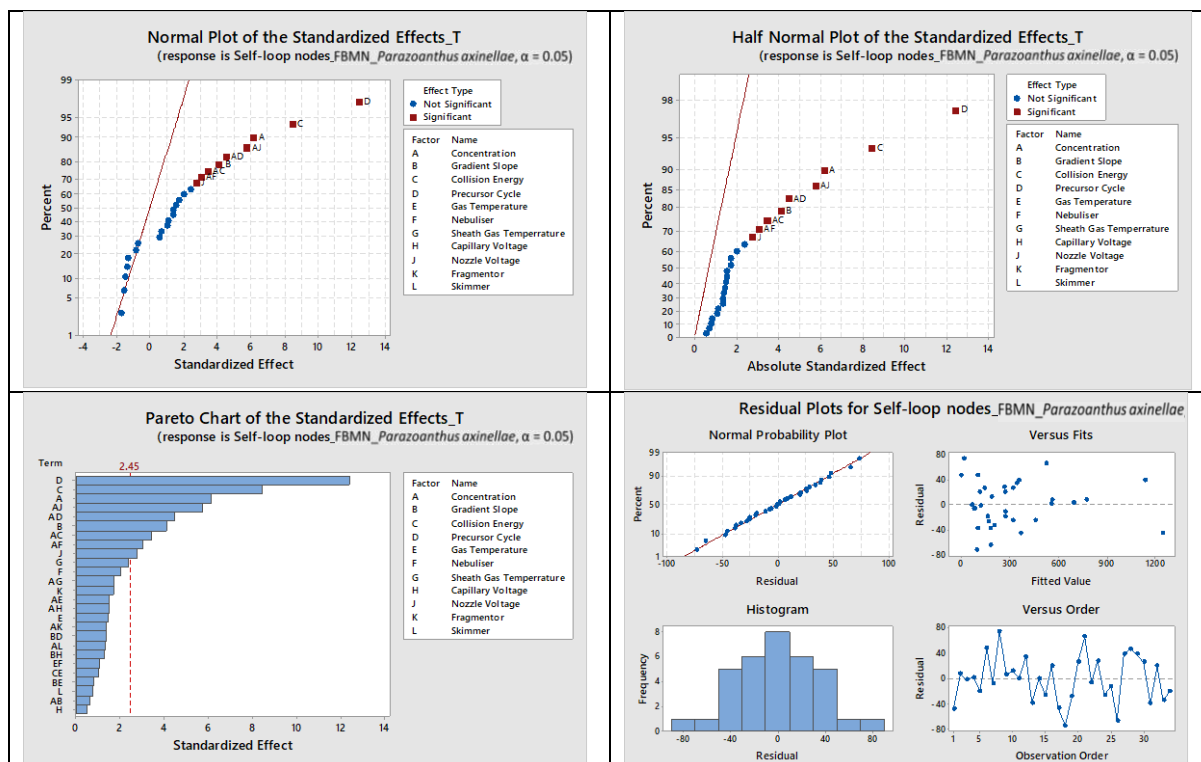

Figure S31: DOE reports for number of self-loop nodes model in Feature-Based Molecular Networking of *Parazoanthus axinellae*, normal plot of standardized effects (top left), half normal plot of standardized effects (top right), pareto chart of standardized effects (bottom left), and residual plots (bottom right).

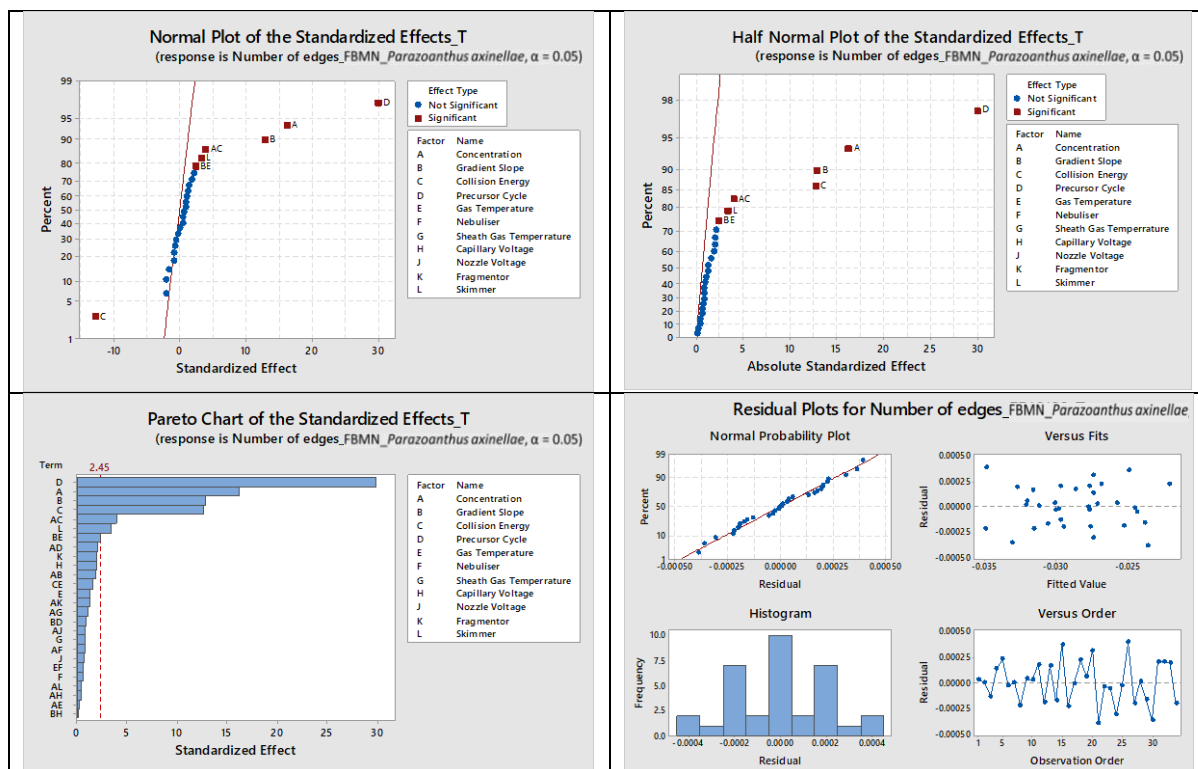

Figure S32: DOE reports for number of edges model in Feature-Based Molecular Networking of *Parazoanthus axinellae*, normal plot of standardized effects (top left), half normal plot of standardized effects (top right), pareto chart of standardized effects (bottom left), and residual plots (bottom right).

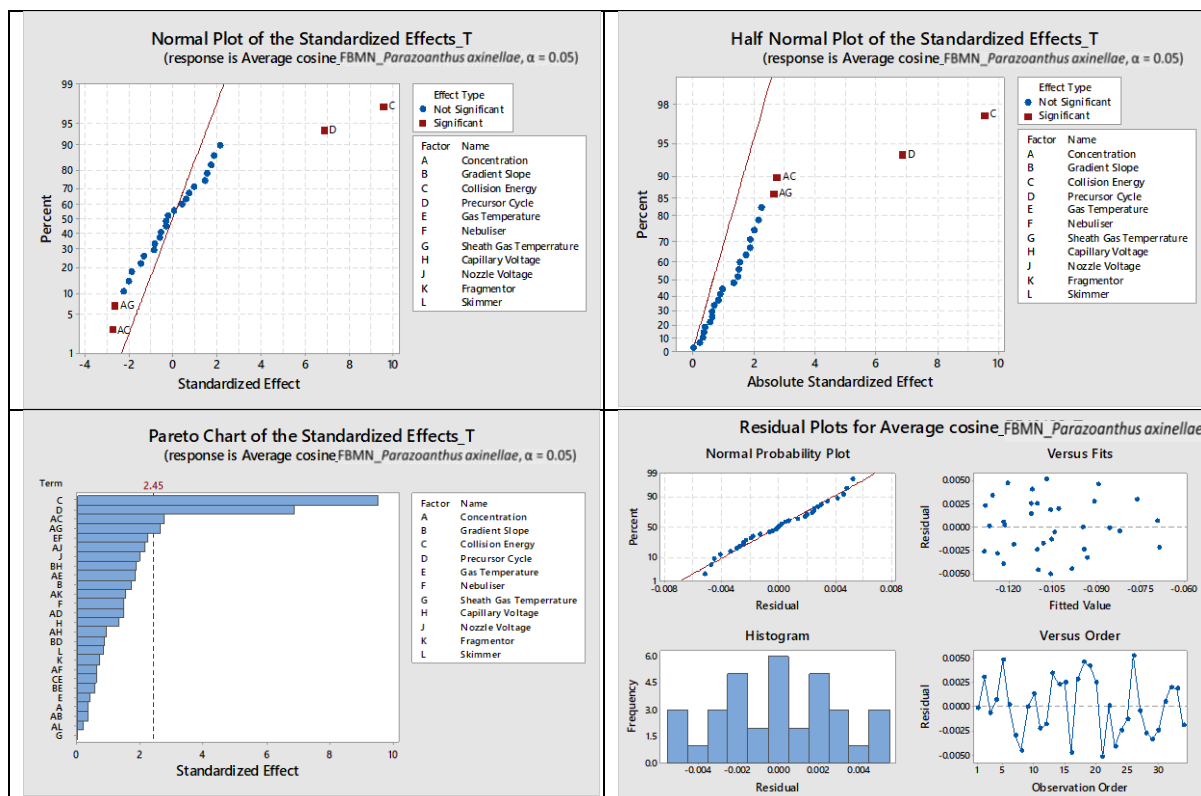

Figure S33: DOE reports for average cosine score model in Feature-Based Molecular Networking of *Parazoanthus axinellae*, normal plot of standardized effects (top left), half normal plot of standardized effects (top right), pareto chart of standardized effects (bottom left), and residual plots (bottom right).

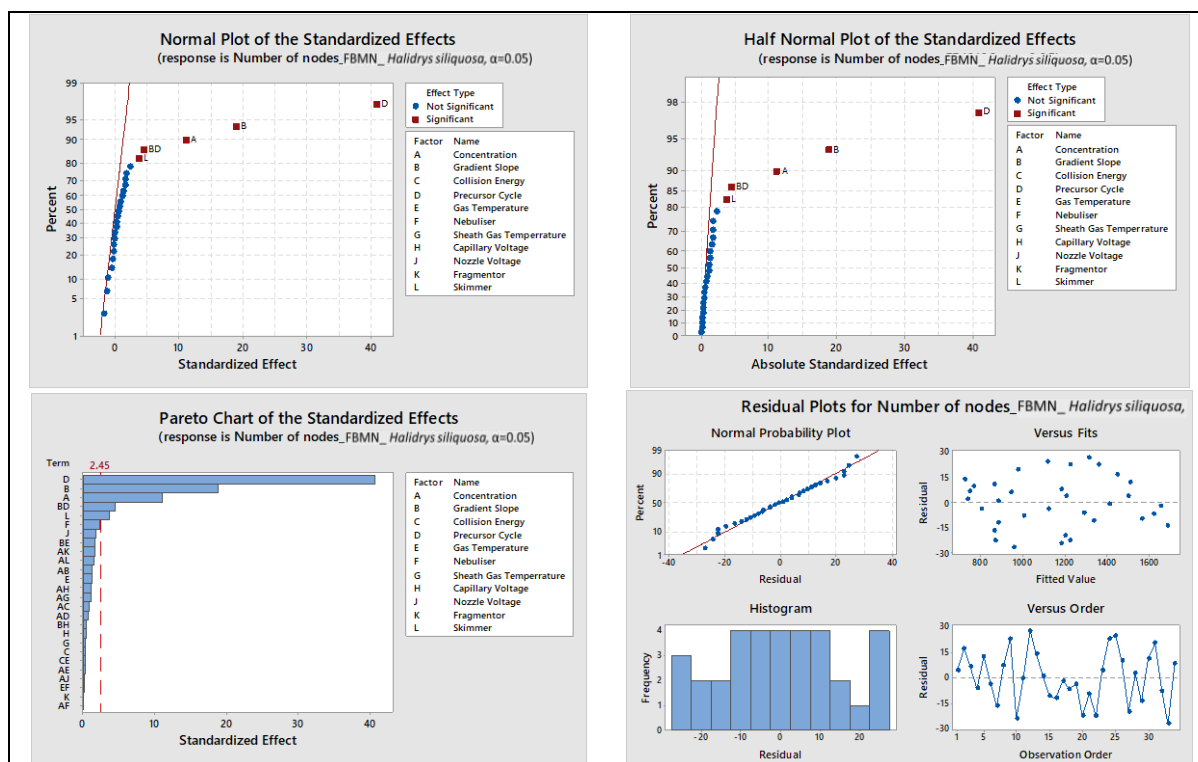

Figure S34: DOE reports for number of nodes model in Feature-Based Molecular Networking of *Halidrys siliquosa*, normal plot of standardized effects (top left), half normal plot of standardized effects (top right), pareto chart of standardized effects (bottom left), and residual plots (bottom right).

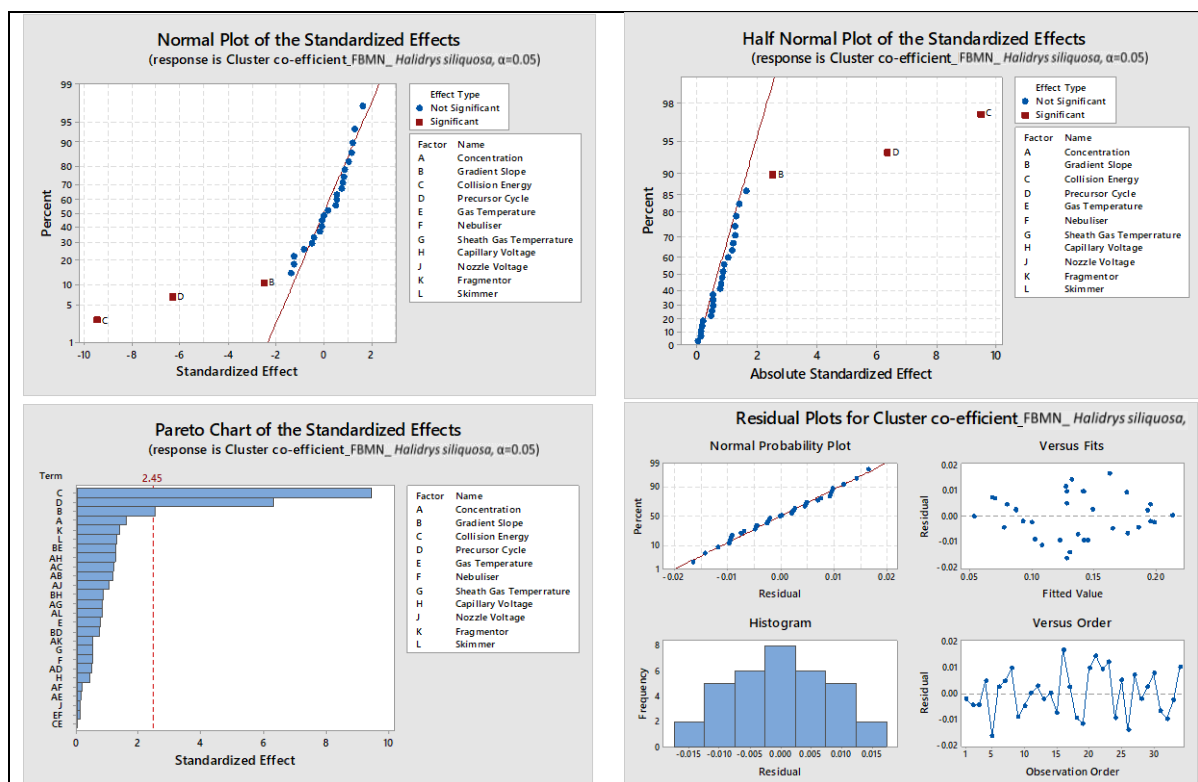

Figure S35: DOE reports for cluster co-efficient model in Feature-Based Molecular Networking of *Halidrys siliquosa*, normal plot of standardized effects (top left), half normal plot of standardized effects (top right), pareto chart of standardized effects (bottom left), and residual plots (bottom right).

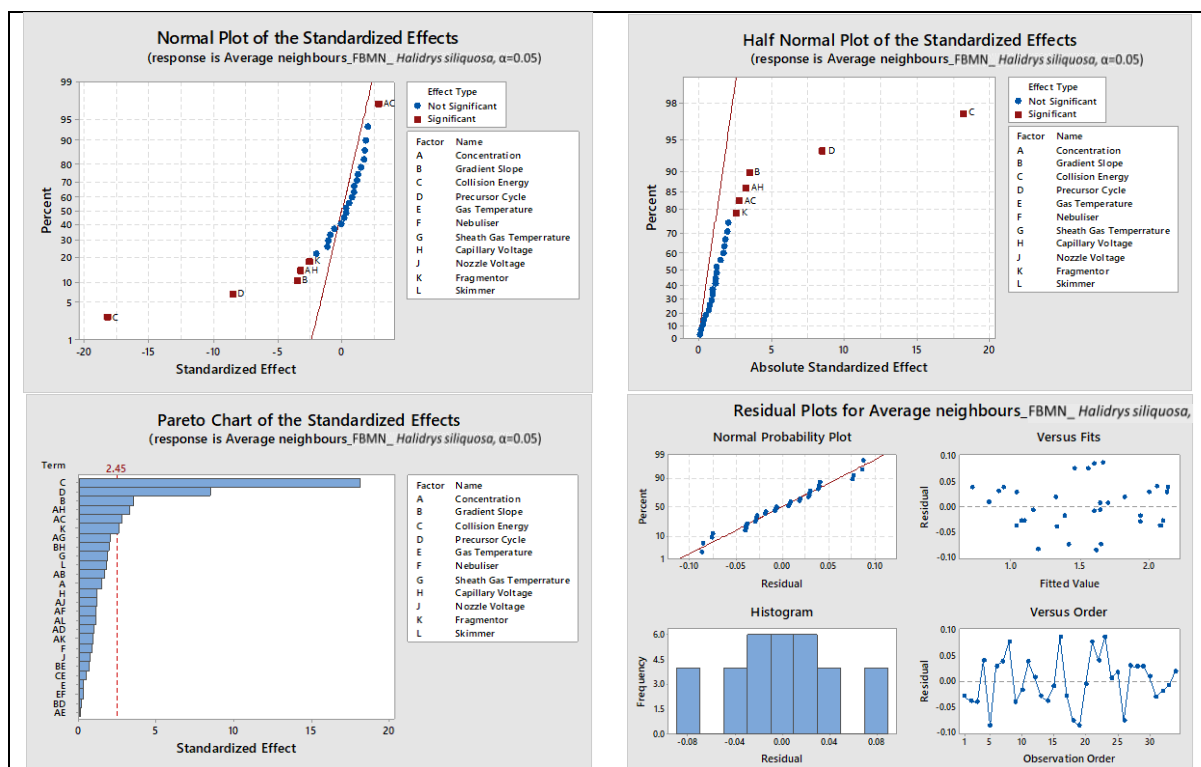

Figure S36: : DOE reports for cluster co-efficient model in Feature-Based Molecular Networking of *Halidrys siliquosa*, normal plot of standardized effects (top left), half normal plot of standardized effects (top right), pareto chart of standardized effects (bottom left), and residual plots (bottom right).

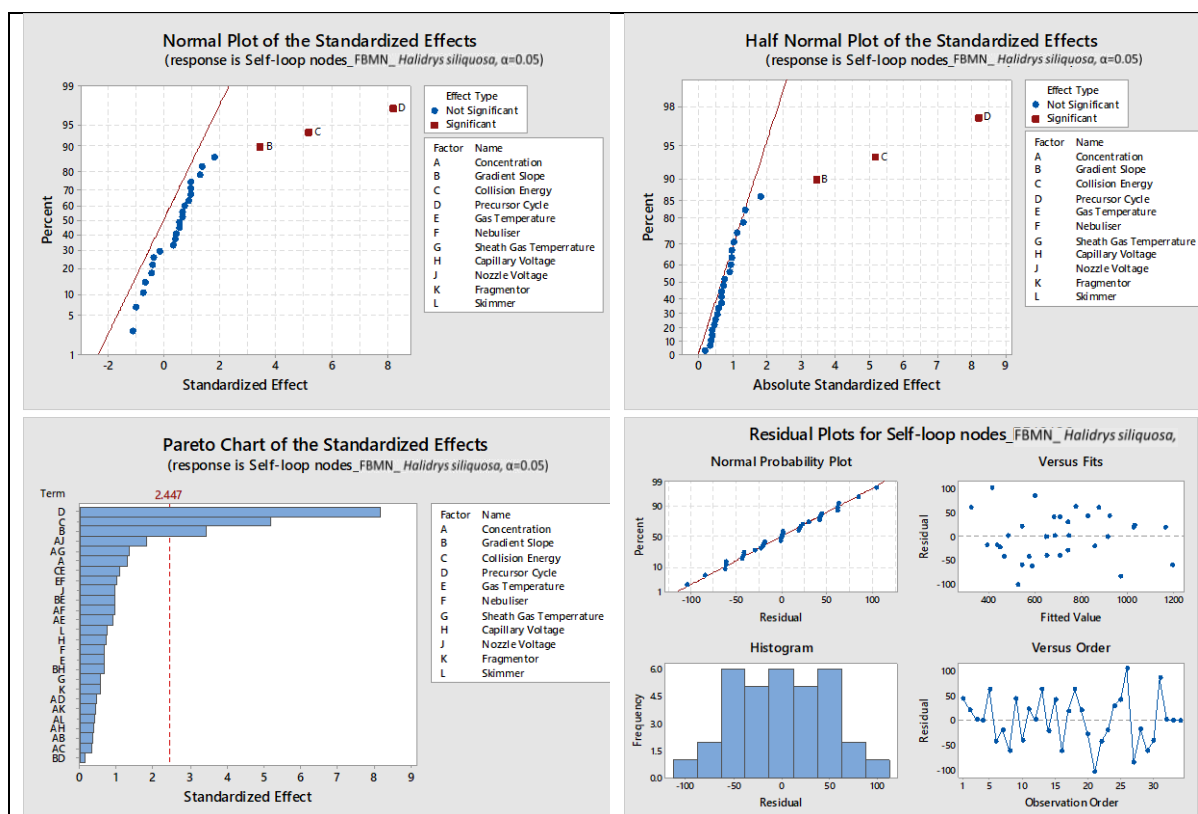

Figure S37: DOE reports for number of self-loop nodes model in Feature-Based Molecular Networking of *Halidrys siliquosa*, normal plot of standardized effects (top left), half normal plot of standardized effects (top right), pareto chart of standardized effects (bottom left), and residual plots (bottom right).

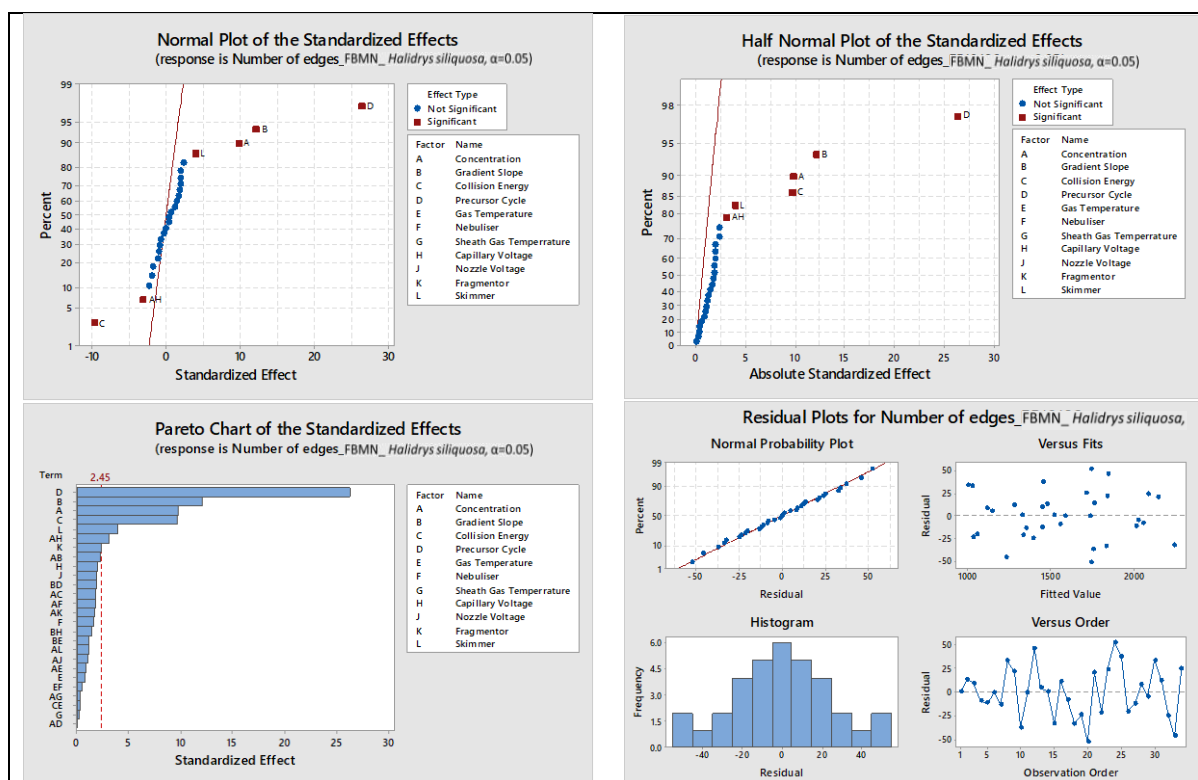

Figure S38: DOE reports for number of edges model in Feature-Based Molecular Networking of *Halidrys siliquosa*, normal plot of standardized effects (top left), half normal plot of standardized effects (top right), pareto chart of standardized effects (bottom left), and residual plots (bottom right).



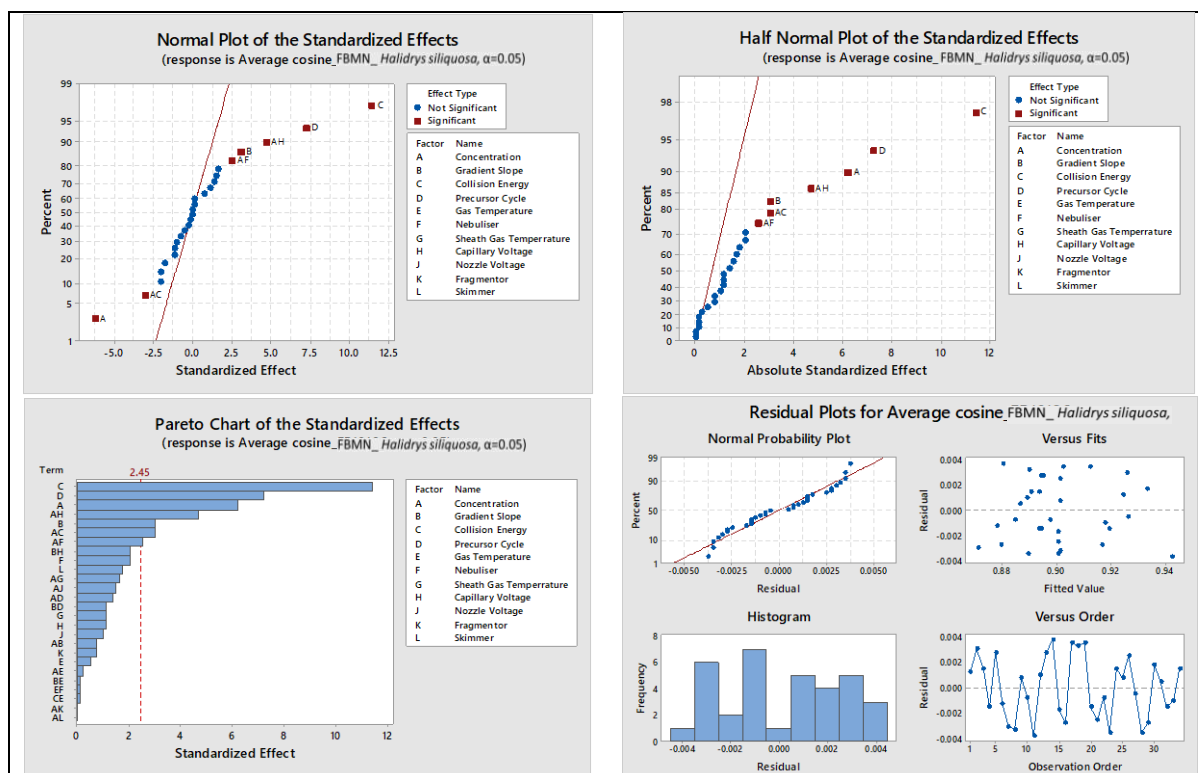

Figure S39: DOE reports for average cosine score model in Feature-Based Molecular Networking of *Halidrys siliquosa*, normal plot of standardized effects (top left), half normal plot of standardized effects (top right), pareto chart of standardized effects (bottom left), and residual plots (bottom right).
